# Supplementary material
Source: ML conference proceedings conference paper supplement (https://proceedings.neurips.cc/paper_files/paper/2020/hash/eefc9e10ebdc4a2333b42b2dbb8f27b6-Abstract.html)
Supplement: Supplementary file [file eefc9e10ebdc4a2333b42b2dbb8f27b6-Supplemental.pdf]

---

# Statistical and Topological Properties of Sliced Probability Divergences

## SUPPLEMENTARY DOCUMENT

---

Kimia Nadjahi<sup>1\*</sup>, Alain Durmus<sup>2</sup>, Lénaïc Chizat<sup>3</sup>,  
Soheil Kolouri<sup>4</sup>, Shahin Shahrampour<sup>5</sup>, Umut Şimşekli<sup>1,6</sup>

1: LTCI, Télécom Paris, Institut Polytechnique de Paris, France  
 2: Centre Borelli, ENS Paris-Saclay, CNRS, Université Paris-Saclay, France  
 3: Laboratoire de Mathématiques d'Orsay, CNRS, Université Paris-Saclay, France  
 4: HRL Laboratories, LLC., Malibu, CA, USA  
 5: Texas A&M University, College Station, TX, USA  
 6: Department of Statistics, University of Oxford, UK

### S1 Postponed proofs for Section 3

#### S1.1 Proof of Proposition 1

*Proof of Proposition 1.* (i) The fact that  $\mathbf{S}\Delta_p$  is non-negative (or symmetric) if  $\Delta$  is, immediately follows from the definition of  $\mathbf{S}\Delta_p$  (4).

(ii) Assume that  $\Delta$  satisfies the identity of indiscernibles, *i.e.* for  $\mu', \nu' \in \mathcal{P}(\mathbb{R})$ ,  $\Delta(\mu', \nu') = 0$  if and only if  $\mu' = \nu'$ . For any  $\mu \in \mathcal{P}(\mathbb{R}^d)$  and  $\theta \in \mathbb{S}^{d-1}$ ,  $\Delta(\theta_{\#}^* \mu, \theta_{\#}^* \mu) = 0$ , therefore  $\mathbf{S}\Delta_p(\mu, \mu) = 0$  by its definition (4). Now, consider  $\mu, \nu \in \mathcal{P}(\mathbb{R}^d)$  such that  $\mathbf{S}\Delta_p(\mu, \nu) = 0$ . Then, by the definition of  $\mathbf{S}\Delta_p$  (4), we have  $\Delta(\theta_{\#}^* \mu, \theta_{\#}^* \nu) = 0$  for  $\sigma$ -almost every ( $\sigma$ -a.e.)  $\theta \in \mathbb{S}^{d-1}$ , therefore  $\theta_{\#}^* \mu = \theta_{\#}^* \nu$  for  $\sigma$ -a.e.  $\theta \in \mathbb{S}^{d-1}$ . Next, we use the same technique as in [1, Proposition 5.1.2]: for any measure  $\xi \in \mathcal{P}(\mathbb{R}^s)$  ( $s \geq 1$ ),  $\mathcal{F}[\xi]$  denotes the Fourier transform of  $\xi$  and is defined as, for any  $w \in \mathbb{R}^s$ ,

$$\mathcal{F}[\xi](w) = \int_{\mathbb{R}^s} e^{-i\langle w, x \rangle} d\xi(x).$$

Then, by using (S1) and the property of pushforward measures, we have for any  $t \in \mathbb{R}$  and  $\theta \in \mathbb{S}^{d-1}$ ,

$$\mathcal{F}[\theta_{\#}^* \mu](t) = \int_{\mathbb{R}} e^{-itu} d\theta_{\#}^* \mu(u) = \int_{\mathbb{R}^d} e^{-it\langle \theta, x \rangle} d\mu(x) = \mathcal{F}[\mu](t\theta). \quad (\text{S1})$$

Since for  $\sigma$ -a.e.  $\theta \in \mathbb{S}^{d-1}$ ,  $\theta_{\#}^* \mu = \theta_{\#}^* \nu$  thus  $\mathcal{F}[\theta_{\#}^* \mu] = \mathcal{F}[\theta_{\#}^* \nu]$ , we obtain  $\mathcal{F}[\mu] = \mathcal{F}[\nu]$ . By the injectivity of the Fourier transform, we conclude that  $\mu = \nu$ .

(iii) Suppose  $\Delta$  is a metric. Based on the previous results, to show that  $\mathbf{S}\Delta_p$  is a metric, all we need to prove here is that it verifies the triangle inequality. Let  $\mu, \nu, \xi \in \mathcal{P}(\mathbb{R}^d)$ . Using that  $\Delta$  satisfies the triangle inequality and the Minkowski inequality in  $L^p(\mathbb{S}^{d-1}, \sigma)$ , we get

$$\begin{aligned} \mathbf{S}\Delta_p(\mu, \nu) &= \left\{ \int_{\mathbb{S}^{d-1}} \Delta^p(\theta_{\#}^* \mu, \theta_{\#}^* \nu) d\sigma(\theta) \right\}^{1/p} \\ &\leq \left\{ \int_{\mathbb{S}^{d-1}} \left[ \Delta(\theta_{\#}^* \mu, \theta_{\#}^* \xi) + \Delta(\theta_{\#}^* \xi, \theta_{\#}^* \nu) \right]^p d\sigma(\theta) \right\}^{1/p} \\ &\leq \left\{ \int_{\mathbb{S}^{d-1}} \Delta^p(\theta_{\#}^* \mu, \theta_{\#}^* \xi) d\sigma(\theta) \right\}^{1/p} + \left\{ \int_{\mathbb{S}^{d-1}} \Delta^p(\theta_{\#}^* \xi, \theta_{\#}^* \nu) d\sigma(\theta) \right\}^{1/p} \\ &\leq \mathbf{S}\Delta_p(\mu, \xi) + \mathbf{S}\Delta_p(\xi, \nu). \end{aligned}$$

---

\*Corresponding author: kimia.nadjahi@telecom-paris.fr

□

## S1.2 Proof of Theorem 1

We start by proving Lemma S1 below, which extends [2, Lemma S13] to the more general class of Sliced Probability Divergences.

**Lemma S1.** *Consider  $(\mu_k)_{k \in \mathbb{N}}$  a sequence in  $\mathcal{P}(\mathbb{R}^d)$  satisfying  $\lim_{k \rightarrow \infty} \mathbf{S}\Delta_1(\mu_k, \mu) = 0$ , with  $\mu \in \mathcal{P}(\mathbb{R}^d)$ , and assume that the convergence in  $\Delta$  implies the weak convergence in  $\mathcal{P}(\mathbb{R})$ . Then, there exists an increasing function  $\phi : \mathbb{N} \rightarrow \mathbb{N}$  such that the subsequence  $(\mu_{\phi(k)})_{k \in \mathbb{N}}$  converges weakly to  $\mu$ .*

*Proof.* We assume that  $\lim_{k \rightarrow \infty} \mathbf{S}\Delta_1(\mu_k, \mu) = 0$ , i.e.:

$$\lim_{k \rightarrow \infty} \int_{\mathbb{S}^{d-1}} \Delta(\theta_{\sharp}^* \mu_k, \theta_{\sharp}^* \mu) d\sigma(\theta) = 0 \quad (\text{S2})$$

By [3, Theorem 2.2.5], (S2) implies that, there exists an increasing function  $\phi : \mathbb{N} \rightarrow \mathbb{N}$  such that for  $\sigma$ -a.e.  $\theta \in \mathbb{S}^{d-1}$ ,  $\lim_{k \rightarrow \infty} \Delta(\theta_{\sharp}^* \mu_{\phi(k)}, \theta_{\sharp}^* \mu) = 0$ . Since  $\Delta$  is assumed to imply weak convergence in  $\mathcal{P}(\mathbb{R})$ , then, for  $\sigma$ -a.e.  $\theta \in \mathbb{S}^{d-1}$ ,  $(\theta_{\sharp}^* \mu_{\phi(k)})_{k \in \mathbb{N}}$  converges weakly to  $\theta_{\sharp}^* \mu$ . By Lévy's characterization [4, Theorem 4.3], we have for  $\sigma$ -a.e.  $\theta \in \mathbb{S}^{d-1}$  and any  $s \in \mathbb{R}$ ,

$$\lim_{k \rightarrow \infty} \Phi_{\theta_{\sharp}^* \mu_{\phi(k)}}(s) = \Phi_{\theta_{\sharp}^* \mu}(s),$$

where  $\Phi_{\nu}$  is the characteristic function of  $\nu \in \mathcal{P}(\mathbb{R}^s)$  ( $s \geq 1$ ) and is defined as: for any  $v \in \mathbb{R}^s$ ,  $\Phi_{\nu}(v) = \int_{\mathbb{R}^s} e^{i\langle v, w \rangle} d\nu(w)$ . Therefore, for Lebesgue (Leb)-almost every  $z \in \mathbb{R}^d$ ,

$$\lim_{k \rightarrow \infty} \Phi_{\mu_{\phi(k)}}(z) = \Phi_{\mu}(z). \quad (\text{S3})$$

We now use (S3) to show that  $(\mu_{\phi(k)})_{k \in \mathbb{N}}$  converges weakly to  $\mu$ . By [5, Problem 1.11, Chapter 1], this boils down to proving that, for any  $f : \mathbb{R}^d \rightarrow \mathbb{R}$  continuous with compact support,

$$\lim_{k \rightarrow \infty} \int_{\mathbb{R}^d} f(z) d\mu_{\phi(k)}(z) = \int_{\mathbb{R}^d} f(z) d\mu(z). \quad (\text{S4})$$

Consider  $\sigma > 0$  and a continuous function  $f : \mathbb{R}^d \rightarrow \mathbb{R}$  with compact support. We introduce the function  $f_{\sigma}$  defined as: for any  $x \in \mathbb{R}^d$ ,

$$f_{\sigma}(x) = (2\pi\sigma^2)^{-d/2} \int_{\mathbb{R}^d} f(x-z) \exp(-\|z\|^2/(2\sigma^2)) dz = f * g_{\sigma}(x),$$

where  $*$  denotes the convolution product, and  $g_{\sigma}$  is the density of the  $d$ -dimensional Gaussian with zero mean and covariance matrix  $\sigma^2 \mathbf{I}_d$ . First, we prove that (S4) holds with  $f_{\sigma}$  in place of  $f$ . The characteristic function associated to a  $d$ -dimensional Gaussian random variable  $G$  with zero mean and covariance matrix  $(1/\sigma^2) \mathbf{I}_d$  is given by: for any  $z \in \mathbb{R}^d$ ,  $\mathbb{E}[e^{i\langle z, G \rangle}] = e^{-\|z\|^2/(2\sigma^2)}$ . By plugging this in the definition of  $f_{\sigma}$  and using Fubini's theorem, we obtain for any  $k \in \mathbb{N}$ ,

$$\begin{aligned} \int_{\mathbb{R}^d} f_{\sigma}(z) d\mu_{\phi(k)}(z) &= \int_{\mathbb{R}^d} \int_{\mathbb{R}^d} f(w) g_{\sigma}(z-w) dw d\mu_{\phi(k)}(z) \\ &= (2\pi\sigma^2)^{-d/2} \int_{\mathbb{R}^d} \int_{\mathbb{R}^d} f(w) \int_{\mathbb{R}^d} e^{i\langle z-w, x \rangle} g_{1/\sigma}(x) dx dw d\mu_{\phi(k)}(z) \\ &= (2\pi\sigma^2)^{-d/2} \int_{\mathbb{R}^d} \int_{\mathbb{R}^d} f(w) e^{-i\langle w, x \rangle} g_{1/\sigma}(x) \Phi_{\mu_{\phi(k)}}(x) dx dw \\ &= (2\pi\sigma^2)^{-d/2} \int_{\mathbb{R}^d} \mathcal{F}[f](x) g_{1/\sigma}(x) \Phi_{\mu_{\phi(k)}}(x) dx, \end{aligned} \quad (\text{S5})$$

where  $\mathcal{F}[f](x) = \int_{\mathbb{R}^d} f(w) e^{-i\langle w, x \rangle} dw$  is the Fourier transform of  $f$ . Since the support of  $f$  is assumed to be compact,  $\mathcal{F}[f]$  exists and is bounded by  $\int_{\mathbb{R}^d} |f(w)| dw < +\infty$ , therefore, for any  $k \in \mathbb{N}$  and  $x \in \mathbb{R}^d$ ,

$$|\mathcal{F}[f](x) g_{1/\sigma}(x) \Phi_{\mu_{\phi(k)}}(x)| \leq g_{1/\sigma}(x) \int_{\mathbb{R}^d} |f(w)| dw.$$

We can prove with similar techniques that (S5) holds with  $\mu$  in place of  $\mu_{\phi(k)}$ , *i.e.*:

$$\int_{\mathbb{R}^d} f_{\sigma}(z) d\mu(z) = (2\pi\sigma^2)^{-d/2} \int_{\mathbb{R}^d} \mathcal{F}[f](x) g_{1/\sigma}(x) \Phi_{\mu}(x) dx . \quad (\text{S6})$$

Using (S3), (S5), (S6) and Lebesgue's Dominated Convergence Theorem, we obtain:

$$\begin{aligned} \lim_{k \rightarrow \infty} (2\pi\sigma^2)^{-d/2} \int_{\mathbb{R}^d} \mathcal{F}[f](x) g_{1/\sigma}(x) \Phi_{\mu_{\phi(k)}}(x) dx &= (2\pi\sigma^2)^{-d/2} \int_{\mathbb{R}^d} \mathcal{F}[f](x) g_{1/\sigma}(x) \Phi_{\mu}(x) dx , \\ \text{i.e., } \lim_{k \rightarrow \infty} \int_{\mathbb{R}^d} f_{\sigma}(z) d\mu_{\phi(k)}(z) &= \int_{\mathbb{R}^d} f_{\sigma}(z) d\mu(z) . \end{aligned} \quad (\text{S7})$$

We can now prove (S4): for any  $\sigma > 0$ ,

$$\begin{aligned} &\left| \int_{\mathbb{R}^d} f(z) d\mu_{\phi(k)}(z) - \int_{\mathbb{R}^d} f(z) d\mu(z) \right| \\ &\leq 2 \sup_{z \in \mathbb{R}^d} |f(z) - f_{\sigma}(z)| + \left| \int_{\mathbb{R}^d} f_{\sigma}(z) d\mu_{\phi(k)}(z) - \int_{\mathbb{R}^d} f_{\sigma}(z) d\mu(z) \right| . \end{aligned}$$

By (S7), we deduce that for any  $\sigma > 0$ ,

$$\limsup_{k \rightarrow +\infty} \left| \int_{\mathbb{R}^d} f(z) d\mu_{\phi(k)}(z) - \int_{\mathbb{R}^d} f(z) d\mu(z) \right| \leq 2 \sup_{z \in \mathbb{R}^d} |f(z) - f_{\sigma}(z)| ,$$

and since  $\lim_{\sigma \rightarrow 0} \sup_{z \in \mathbb{R}^d} |f(z) - f_{\sigma}(z)| = 0$  [6, Theorem 8.14-b], we conclude that  $(\mu_{\phi(k)})_{k \in \mathbb{N}}$  converges weakly to  $\mu$ . □

We can now prove Theorem 1.

*Proof of Theorem 1.* Let  $p \in [1, \infty)$  and  $(\mu_k)_{k \in \mathbb{N}}$  be a sequence of probability measures in  $\mathcal{P}(\mathbb{R}^d)$ .

First, suppose  $(\mu_k)_{k \in \mathbb{N}}$  converges weakly to  $\mu \in \mathcal{P}(\mathbb{R}^d)$ . By the continuous mapping theorem, since for any  $\theta \in \mathbb{S}^{d-1}$ ,  $\theta^*$  is a bounded linear form thus continuous, then  $(\theta_{\#}^* \mu_k)_{k \in \mathbb{N}}$  converges weakly to  $\theta_{\#}^* \mu$ . Therefore, according to our assumption on  $\Delta$ , for any  $\theta \in \mathbb{S}^{d-1}$ ,

$$\lim_{k \rightarrow \infty} \Delta(\theta_{\#}^* \mu_k, \theta_{\#}^* \mu) = 0 . \quad (\text{S8})$$

Besides,  $\Delta$  is assumed to be non-negative and bounded. Hence, there exists  $M > 0$  such that, for any  $k \in \mathbb{N}$ ,

$$\Delta^p(\theta_{\#}^* \mu_k, \theta_{\#}^* \mu) \leq M . \quad (\text{S9})$$

Using (S8), (S9) and the bounded convergence theorem, we obtain

$$\lim_{k \rightarrow \infty} \mathbf{S}\Delta_p^p(\mu_k, \mu) = \lim_{k \rightarrow \infty} \int_{\mathbb{S}^{d-1}} \Delta^p(\theta_{\#}^* \mu_k, \theta_{\#}^* \mu) d\sigma(\theta) = \int_{\mathbb{S}^{d-1}} 0^p d\sigma(\theta) = 0 . \quad (\text{S10})$$

Since the mapping  $t \mapsto t^{1/p}$  is continuous on  $\mathbb{R}_+$  (and can be applied to  $\mathbf{S}\Delta_p^p$ , which is non-negative by the non-negativity of  $\Delta$  and Proposition 1), then (S10) implies  $\lim_{k \rightarrow \infty} \mathbf{S}\Delta_p(\mu_k, \mu) = 0$ .

Now, let us prove the other implication, *i.e.*  $\lim_{k \rightarrow \infty} \mathbf{S}\Delta_p(\mu_k, \mu) = 0$  implies the weak convergence of  $(\mu_k)_{k \in \mathbb{N}}$  to  $\mu$ , given the assumptions on  $\Delta$ . This result is a generalization of [2, Theorem 1], and is proved analogously, using Lemma S1: consider  $(\mu_k)_{k \in \mathbb{N}}$  and  $\mu$  in  $\mathcal{P}(\mathbb{R}^d)$  such that

$$\lim_{k \rightarrow \infty} \mathbf{S}\Delta_p(\mu_k, \mu) = 0 , \quad (\text{S11})$$

and suppose  $(\mu_k)_{k \in \mathbb{N}}$  does not converge weakly to  $\mu$ . Therefore,  $\lim_{k \rightarrow \infty} \mathbf{d}_{\mathcal{P}}(\mu_k, \mu) \neq 0$ , where  $\mathbf{d}_{\mathcal{P}}$  is the Lévy-Prokhorov metric, *i.e.* there exists  $\epsilon > 0$  and a subsequence  $(\mu_{\psi(k)})_{k \in \mathbb{N}}$  with  $\psi : \mathbb{N} \rightarrow \mathbb{N}$  increasing, such that for any  $k \in \mathbb{N}$ ,

$$\mathbf{d}_{\mathcal{P}}(\mu_{\psi(k)}, \mu) > \epsilon . \quad (\text{S12})$$

On the other hand, an application of Hölder's inequality on  $\mathbb{S}^{d-1}$  gives for any  $\mu, \nu$  in  $\mathcal{P}(\mathbb{R}^d)$ ,

$$\mathbf{S}\Delta_1(\mu, \nu) \leq \mathbf{S}\Delta_p(\mu, \nu).$$

Then, by (S11),  $\lim_{k \rightarrow \infty} \mathbf{S}\Delta_1(\mu_{\psi(k)}, \mu) = 0$ . Since we assume the convergence in  $\Delta$  implies the weak convergence in  $\mathcal{P}(\mathbb{R})$ , Lemma S1 gives us: there exists a subsequence  $(\mu_{\phi(\psi(k))})_{k \in \mathbb{N}}$  with  $\phi : \mathbb{N} \rightarrow \mathbb{N}$  increasing such that  $(\mu_{\phi(\psi(k))})_{k \in \mathbb{N}}$  converges weakly to  $\mu$ . This is equivalent to  $\lim_{k \rightarrow \infty} \mathbf{d}_{\mathcal{P}}(\mu_{\phi(\psi(k))}, \mu) = 0$ , which contradicts (S12). We conclude that (S11) implies the weak convergence of  $(\mu_k)_{k \in \mathbb{N}}$  to  $\mu$ . □

### S1.3 Proof of Theorem 2

*Proof of Theorem 2.* Let  $p \in [1, \infty)$  and  $\mu, \nu \in \mathcal{P}(\mathbb{R}^d)$ .

$$\begin{aligned} (\mathbf{S}\gamma_{\tilde{\mathbb{F}}, p})^p(\mu, \nu) &= \int_{\mathbb{S}^{d-1}} \gamma_{\tilde{\mathbb{F}}}^p(\theta^* \mu, \theta^* \nu) d\sigma(\theta) \\ &= \int_{\mathbb{S}^{d-1}} \left\{ \sup_{\tilde{f} \in \tilde{\mathbb{F}}} \left| \int_{\mathbb{R}} \tilde{f}(t) d(\theta^* \mu - \theta^* \nu)(t) \right| \right\}^p d\sigma(\theta) \\ &= \int_{\mathbb{S}^{d-1}} \left| \int_{\mathbb{R}} \tilde{f}^*(t) d(\theta^* \mu - \theta^* \nu)(t) \right|^p d\sigma(\theta) \\ &= \int_{\mathbb{S}^{d-1}} \left| \int_{\mathbb{R}^d} \tilde{f}^*(\theta^*(x)) d(\mu - \nu)(x) \right|^p d\sigma(\theta), \end{aligned} \quad (\text{S13})$$

with  $\tilde{f}^* = \operatorname{argmax}_{\tilde{f} \in \tilde{\mathbb{F}}} \left| \int_{\mathbb{R}} \tilde{f}(t) d\theta^* \mu(t) - \int_{\mathbb{R}} \tilde{f}(t) d\theta^* \nu(t) \right|$ , which is assumed to exist. Note that (S13) results from applying the property of pushforward measures.

By definition of  $\mathbb{F}$ , for any  $\theta \in \mathbb{S}^{d-1}$ , there exists  $f_\theta^* \in \mathbb{F}$  such that  $f_\theta^* = \tilde{f}^* \circ \theta^*$ . Therefore, we obtain

$$\begin{aligned} (\mathbf{S}\gamma_{\mathbb{F}, p})^p(\mu, \nu) &= \int_{\mathbb{S}^{d-1}} \left| \int_{\mathbb{R}^d} f_\theta^*(x) d(\mu - \nu)(x) \right|^p d\sigma(\theta) \\ &\leq \int_{\mathbb{S}^{d-1}} \left\{ \sup_{f \in \mathbb{F}} \left| \int_{\mathbb{R}^d} f(x) d(\mu - \nu)(x) \right| \right\}^p d\sigma(\theta) \\ &= \gamma_{\mathbb{F}}^p(\mu, \nu) \int_{\mathbb{S}^{d-1}} d\sigma(\theta) = \gamma_{\mathbb{F}}^p(\mu, \nu), \end{aligned}$$

which completes the proof. □

Informally, the condition on the function classes in Theorem 2 requires that  $\mathbb{F}$  and  $\tilde{\mathbb{F}}$  should be linked to each other in the way that  $\mathbb{F}$  should be large enough to contain the composition of *all* elements of  $\tilde{\mathbb{F}}$  with *all* possible linear forms  $\theta^*$  for  $\theta \in \mathbb{S}^{d-1}$ . Let us illustrate this condition by considering the Wasserstein distance of order 1. In this case,  $\mathbb{F}$  is the set of 1-Lipschitz functions from  $\mathbb{R}^d$  to  $\mathbb{R}$ , and  $\tilde{\mathbb{F}}$  is the set of 1-Lipschitz functions from  $\mathbb{R}$  to  $\mathbb{R}$ . Then, the condition on  $\mathbb{F}$  boils down to showing that the composition of any  $\tilde{f} \in \tilde{\mathbb{F}}$  with any linear projection  $\theta^*$  results in a 1-Lipschitz function in  $\mathbb{R}^d$ , which is simply true since  $\tilde{f}$  is 1-Lipschitz and  $\|\theta\| = 1$  for all  $\theta \in \mathbb{S}^{d-1}$ .

In the next three corollaries, we formally prove that Theorem 2 holds for the Wasserstein distance of order 1  $\mathbf{W}_1$ , total variation distance  $\mathbf{TV}$  and maximum mean discrepancy  $\mathbf{MMD}$ . We denote by  $\mathbf{SW}_1$ ,  $\mathbf{STV}_p$  and  $\mathbf{SMMD}_p$  the respective sliced versions of these IPMs with order  $p \in [1, \infty)$ .

**Corollary S1.** *Let  $p \in [1, \infty)$ . For any  $\mu, \nu \in \mathcal{P}_1(\mathbb{R}^d)$ ,  $\mathbf{SW}_1(\mu, \nu) \leq \mathbf{W}_1(\mu, \nu)$ .*

*Proof.* Choose  $\tilde{\mathbb{F}} = \{\tilde{f} : \mathbb{R} \rightarrow \mathbb{R} : \|\tilde{f}\|_{\text{Lip}} \leq 1\}$ , where  $\|\tilde{f}\|_{\text{Lip}} = \sup_{x, y \in \mathbb{R}^d, x \neq y} \{|\tilde{f}(x) - \tilde{f}(y)| / \|x - y\|\}$ . Let  $f : \mathbb{R}^d \rightarrow \mathbb{R}$  such that  $f = \tilde{f} \circ \theta^*$  with  $\tilde{f} \in \tilde{\mathbb{F}}, \theta \in \mathbb{S}^{d-1}$ . Then, by using the

Cauchy-Schwarz inequality and the definition of  $\tilde{F}$ , we have for any  $x, y \in \mathbb{R}^d$ ,

$$|f(x) - f(y)| = |\tilde{f}(\theta^*(x)) - \tilde{f}(\theta^*(y))| \leq |\langle \theta, x - y \rangle| \leq \|\theta^*\| \|x - y\| \leq \|x - y\|.$$

Therefore,  $f \in F = \{f : \mathbb{R}^d \rightarrow \mathbb{R} : \|f\|_{\text{Lip}} \leq 1\}$ . Corollary S1 follows from the application of Theorem 2 along with the definition of  $\mathbf{W}_1$ .  $\square$

Note that Corollary S1 is not a new result: the fact that  $\mathbf{SW}_p$  is bounded above by  $\mathbf{W}_p$  for  $p \in [1, \infty)$  was established in [1, Proposition 5.1.3]. While their result is proved using the primal formulation of the OT problem, we used the dual formulation available for  $p = 1$  to illustrate the applicability of Theorem 2. Our result is thus consistent with the existing results in the literature.

**Corollary S2.** *Let  $p \in [1, \infty)$ . For any  $\mu, \nu \in \mathcal{P}(\mathbb{R}^d)$ ,*

$$\mathbf{STV}_p(\mu, \nu) \leq \mathbf{TV}(\mu, \nu).$$

*Proof.* Choose  $\tilde{F} = \{\tilde{f} : \mathbb{R} \rightarrow \mathbb{R}, \|\tilde{f}\|_\infty \leq 1\}$ , and let  $f : \mathbb{R}^d \rightarrow \mathbb{R}$  such that  $f = \tilde{f} \circ \theta^*$  with  $\tilde{f} \in \tilde{F}, \theta \in \mathbb{S}^{d-1}$ . Then,

$$\|f\|_\infty = \|\tilde{f} \circ \theta^*\|_\infty = \sup_{x \in \mathbb{R}^d} |\tilde{f}(\theta^*(x))| \leq \sup_{t \in \mathbb{R}} |\tilde{f}(t)| = \|\tilde{f}\|_\infty \leq 1,$$

hence,  $f \in F = \{f : \mathbb{R}^d \rightarrow \mathbb{R} : \|f\|_\infty \leq 1\}$ . We obtain the final result by using Theorem 2 and the definition of TV.  $\square$

**Corollary S3.** *Let  $\tilde{F} \subset \mathbb{M}_b(\mathbb{R})$  be the unit ball of the RKHS with reproducing kernel  $\tilde{k}$ , and  $k$  be the positive definite kernel such that for any  $x_i, x_j \in \mathbb{R}^d$ ,*

$$k(x_i, x_j) = \int_{\mathbb{S}^{d-1}} \tilde{k}(\theta^*(x_i), \theta^*(x_j)) d\sigma(\theta).$$

*Define  $F \subset \mathbb{M}_b(\mathbb{R}^d)$  as the unit ball of the RKHS whose reproducing kernel  $\hat{k}$  satisfies  $k - \hat{k}$  is positive definite. Then, for any  $p \in [1, \infty)$  and  $\mu, \nu \in \mathcal{P}(\mathbb{R}^d)$ ,*

$$\mathbf{SMMD}_p(\mu, \nu; \tilde{F}) \leq \mathbf{MMD}(\mu, \nu; F),$$

*where  $\mathbf{MMD}(\cdot, \cdot; F')$  and  $\mathbf{SMMD}_p(\cdot, \cdot; F')$  respectively denote the MMD and the Sliced-MMD of order  $p$  in the RKHS whose unit ball is  $F'$ .*

*In particular, this property holds for*

- (i) *Linear kernels:  $\tilde{k}(t_i, t_j) = t_i t_j$  for  $t_i, t_j \in \mathbb{R}$ , and  $\hat{k}(x_i, x_j) = x_i^\top x_j / d'$  for  $x_i, x_j \in \mathbb{R}$  and  $d' \geq d$ .*
- (ii) *Radial basis function (RBF) kernels: let  $h \geq 0$ ,  $\tilde{k}(t_i, t_j) = e^{-|t_i - t_j|^2 / h}$  for  $t_i, t_j \in \mathbb{R}$ , and  $\hat{k}(x_i, x_j) = e^{-\|x_i - x_j\|^2 / h}$  for  $x_i, x_j \in \mathbb{R}^d$ .*

*Proof.* Define  $\tilde{F}$  as the unit ball of an RKHS whose reproducing kernel is denoted by  $\tilde{k}$ . Then, any  $\tilde{f} \in \tilde{F}$  satisfies

$$\|\tilde{f}\|_{\tilde{F}}^2 = \sum_{i=1}^n \sum_{j=1}^n \alpha_i \alpha_j \tilde{k}(t_i, t_j) \leq 1, \tag{S14}$$

where  $n \in \mathbb{N}^*$ ,  $\alpha_1, \dots, \alpha_n \in \mathbb{R}$  and  $t_1, \dots, t_n \in \mathbb{R}$ .

Consider  $f : \mathbb{R}^d \rightarrow \mathbb{R}$  such that  $f = \tilde{f} \circ \theta^*$  with  $\tilde{f} \in \tilde{F}$  and  $\theta \in \mathbb{S}^{d-1}$ . By (S14), we have

$$\sum_{i=1}^n \sum_{j=1}^n \alpha_i \alpha_j \tilde{k}(\theta^*(x_i), \theta^*(x_j)) \leq 1 \tag{S15}$$

The integration of (S15) over  $\mathbb{S}^{d-1}$  give us

$$\begin{aligned} & \int_{\mathbb{S}^{d-1}} \sum_{i=1}^n \sum_{j=1}^n \alpha_i \alpha_j \tilde{k}(\theta^*(x_i), \theta^*(x_j)) d\sigma(\theta) \leq \int_{\mathbb{S}^{d-1}} 1 d\sigma(\theta) \\ \text{i.e., } & \sum_{i=1}^n \sum_{j=1}^n \alpha_i \alpha_j \int_{\mathbb{S}^{d-1}} \tilde{k}(\theta^*(x_i), \theta^*(x_j)) d\sigma(\theta) \leq 1. \end{aligned} \quad (\text{S16})$$

Define  $k : \mathbb{R}^d \times \mathbb{R}^d \rightarrow \mathbb{R}$  as  $k(x_i, x_j) = \int_{\mathbb{S}^{d-1}} \tilde{k}(\theta^*(x_i), \theta^*(x_j)) d\sigma(\theta)$  for  $x_i, x_j \in \mathbb{R}^d$ . Since  $\tilde{k}$  is positive definite, so is  $k$ . By the Moore-Aronszajn theorem, there exists a unique RKHS with reproducing kernel  $k$ . Therefore, (S16) means that  $f$  is in the unit ball of the RKHS associated with  $k$ .

Additionally, consider a positive definite kernel  $\hat{k} : \mathbb{R}^d \times \mathbb{R}^d \rightarrow \mathbb{R}$  such that  $k - \hat{k}$  is positive definite on  $\mathbb{R}^d$ . In other words, the following holds for any  $n \in \mathbb{N}$ ,  $v_1, \dots, v_n \in \mathbb{R}$  and  $x_1, \dots, x_n \in \mathbb{R}^d$ ,

$$\sum_{i=1}^n \sum_{j=1}^n v_i v_j \{k(x_i, x_j) - \hat{k}(x_i, x_j)\} \geq 0.$$

Then, by (S16), we obtain  $\sum_{i=1}^n \sum_{j=1}^n \alpha_i \alpha_j \hat{k}(x_i, x_j) \leq 1$ .

Therefore, any  $f$  defined as  $f = \tilde{f} \circ \theta$  with  $\tilde{f} \in \tilde{\mathbb{F}}$  and  $\theta \in \mathbb{S}^{d-1}$  is in the unit ball of the RKHS associated with  $\hat{k}$ , which we denote by  $\mathbb{F}$ . By using Theorem 2 and the definition of MMD, we obtain the desired result: for any  $p \in [1, \infty)$  and  $\mu, \nu \in \mathcal{P}(\mathbb{R}^d)$ ,

$$\text{SMMD}_p(\mu, \nu; \tilde{\mathbb{F}}) \leq \text{MMD}(\mu, \nu; \mathbb{F}). \quad (\text{S17})$$

Next, we show that this result holds for two popular choices of kernels. First, we choose  $\tilde{k}$  as the linear kernel:  $\tilde{k}(t_i, t_j) = t_i t_j$  for  $t_i, t_j \in \mathbb{R}$ . Define  $\hat{k}$  as a rescaled version of the linear kernel in  $\mathbb{R}^d$ :  $\hat{k}(x_i, x_j) = x_i^\top x_j / d'$  for  $x_i, x_j \in \mathbb{R}^d$  and  $d' \geq d$ . Then, for any  $n \in \mathbb{N}$ ,  $v_1, \dots, v_n \in \mathbb{R}$  and  $x_1, \dots, x_n \in \mathbb{R}^d$ ,

$$\begin{aligned} \sum_{i=1}^n \sum_{j=1}^n v_i v_j \{k(x_i, x_j) - \hat{k}(x_i, x_j)\} &= \sum_{i=1}^n \sum_{j=1}^n v_i v_j \left\{ \int_{\mathbb{S}^{d-1}} \theta(x_i) \theta(x_j) d\sigma(\theta) - x_i^\top x_j / d' \right\} \\ &= \sum_{i=1}^n \sum_{j=1}^n v_i v_j \left\{ x_i^\top \left( \int_{\mathbb{S}^{d-1}} \theta \theta^\top d\sigma(\theta) \right) x_j - x_i^\top x_j / d' \right\} \\ &= \sum_{i=1}^n \sum_{j=1}^n v_i v_j x_i^\top x_j \left( 1/d - 1/d' \right) \geq 0, \end{aligned} \quad (\text{S18})$$

where (S18) results from  $\sum_{i=1}^n \sum_{j=1}^n v_i v_j x_i^\top x_j \geq 0$  (the linear kernel is positive definite) and  $d' \geq d$ . We conclude that (S17) holds with  $\tilde{\mathbb{F}}$  defined as the unit ball of the RKHS associated with the linear kernel  $\tilde{k}(t_i, t_j) = t_i t_j$  for  $t_i, t_j \in \mathbb{R}$ , and  $\mathbb{F}$  being the unit ball of the RKHS associated with the rescaled linear kernel  $\hat{k}(x_i, x_j) = x_i^\top x_j / d'$  for  $x_i, x_j \in \mathbb{R}^d$  and  $d' \geq d$ .

We conclude that (S17) holds with  $\tilde{\mathbb{F}}$  defined as the unit ball of the RKHS associated with the linear kernel  $\tilde{k}(t_i, t_j) = t_i t_j$  for  $t_i, t_j \in \mathbb{R}$ , and  $\mathbb{F}$  being the unit ball of the RKHS associated with the rescaled linear kernel  $\hat{k}(x_i, x_j) = x_i^\top x_j / d$  for  $x_i, x_j \in \mathbb{R}^d$ .

We focus now on RBF kernels: let  $h \geq 0$  and choose  $\tilde{k}(t_i, t_j) = e^{-|t_i - t_j|^2/h}$  for  $t_i, t_j \in \mathbb{R}$ , and  $\hat{k}(x_i, x_j) = e^{-\|x_i - x_j\|^2/h}$  for  $x_i, x_j \in \mathbb{R}^d$ . We have for any  $x_i, x_j \in \mathbb{R}^d$ ,

$$\begin{aligned} k(x_i, x_j) &= \int_{\mathbb{S}^{d-1}} \tilde{k}(\theta(x_i), \theta(x_j)) d\sigma(\theta) = \int_{\mathbb{S}^{d-1}} e^{-|\theta^\top x_i - \theta^\top x_j|^2/h} d\sigma(\theta) \\ &= \int_{\mathbb{S}^{d-1}} e^{-|\theta^\top (x_i - x_j)|^2/h} d\sigma(\theta) \\ &= \int_{\mathbb{S}^{d-1}} e^{(-\|x_i - x_j\|^2/h)(\theta^\top (x_i - x_j)/\|x_i - x_j\|)^2} d\sigma(\theta) \\ &= M\left(\frac{1}{2}, \frac{d}{2}, -\frac{\|x_i - x_j\|^2}{h}\right), \end{aligned} \quad (\text{S19})$$

where  $M(a, c, \kappa)$  stands for the confluent hypergeometric function evaluated at  $a, c, \kappa \in \mathbb{R}$ , and appears in the normalizing constant of the multivariate Watson distribution: see [7, Section 2.3] for more details.

$M$  satisfies the following property

$$M\left(\frac{1}{2}, \frac{d}{2}, -\frac{\|x_i - x_j\|^2}{h}\right) = e^{-\|x_i - x_j\|^2/h} M\left(\frac{d-1}{2}, \frac{d}{2}, \frac{\|x_i - x_j\|^2}{h}\right). \quad (\text{S20})$$

Since  $\|x_i - x_j\|^2/h \geq 0$  and  $\kappa \mapsto M(\cdot, \cdot, \kappa)$  is increasing, we have

$$M\left(\frac{d-1}{2}, \frac{d}{2}, \frac{\|x_i - x_j\|^2}{h}\right) \geq M\left(\frac{d-1}{2}, \frac{d}{2}, 0\right) = M\left(\frac{1}{2}, \frac{d}{2}, 0\right) = 1. \quad (\text{S21})$$

Finally, by using (S19) and (S20), we obtain: for any  $n \in \mathbb{N}$ ,  $v_1, \dots, v_n \in \mathbb{R}$  and  $x_1, \dots, x_n \in \mathbb{R}^d$ ,

$$\begin{aligned} \sum_{i=1}^n \sum_{j=1}^n v_i v_j \{k(x_i, x_j) - \hat{k}(x_i, x_j)\} &= \sum_{i=1}^n \sum_{j=1}^n v_i v_j \left[ M\left(\frac{1}{2}, \frac{d}{2}, -\frac{\|x_i - x_j\|^2}{h}\right) - e^{-\|x_i - x_j\|^2/h} \right] \\ &= \sum_{i=1}^n \sum_{j=1}^n v_i v_j e^{-\|x_i - x_j\|^2/h} \left[ M\left(\frac{d-1}{2}, \frac{d}{2}, \frac{\|x_i - x_j\|^2}{h}\right) - 1 \right] \\ &\geq 0, \end{aligned}$$

where the last line follows from (S21) and  $\sum_{i=1}^n \sum_{j=1}^n v_i v_j e^{-\|x_i - x_j\|^2/h} \geq 0$  (RBF kernels are positive definite). We conclude that  $k - \hat{k}$  is positive definite, hence (S17) holds for RBF kernels.  $\square$

### S1.4 Proof of Theorem 3

*Proof of Theorem 3.* We start by upper bounding the distance between two regularized measures. Denote by  $\text{supp}(\zeta)$  the support of the function  $\zeta$ . Let  $\varphi : \mathbb{R} \rightarrow \mathbb{R}_+^*$  be a smooth and even function verifying  $\text{supp}(\varphi) \subset [-1, 1]$  and  $\int_{\mathbb{R}} \varphi(t) d\text{Leb}(t) = 1$ . Define  $\varphi_\lambda(x) = \lambda^{-d} \varphi(\|x\|/\lambda) / \mathcal{A}(\mathbb{S}^{d-1})$ , with  $\mathcal{A}(\mathbb{S}^{d-1})$  denoting the surface area of the  $d$ -dimensional unit sphere:  $\mathcal{A}(\mathbb{S}^{d-1}) = 2\pi^{d/2} / \Gamma(d/2)$ , where  $\Gamma$  is the gamma function. Denote by  $\mathcal{F}[f]$  the Fourier transform of any function  $f$  defined on  $\mathbb{R}^s$  ( $s \geq 1$ ), given by: for any  $x \in \mathbb{R}^s$ ,  $\mathcal{F}[f](x) = \int_{\mathbb{R}^s} f(w) e^{-i\langle w, x \rangle} dw$ . Let  $g \in \mathbf{G}$ . By the isometry properties of the Fourier transform and the definition of  $\varphi_\lambda$ , we have

$$\int_{\mathbb{R}^d} g(x) d(\mu_\lambda - \nu_\lambda)(x) = \int_{\mathbb{R}^d} \mathcal{F}[g](w) \{ \mathcal{F}[\mu](w) - \mathcal{F}[\nu](w) \} \mathcal{F}[\varphi](\lambda w) dw,$$

where  $\mu_\lambda = \mu * \varphi_\lambda$  and  $\nu_\lambda = \nu * \varphi_\lambda$ . By representing  $w$  with its polar coordinates  $(r, \theta) \in [0, \infty) \times \mathbb{S}^{d-1}$ , we obtain

$$\int_{\mathbb{R}^d} g(x) d(\mu_\lambda - \nu_\lambda)(x) = \int_{\mathbb{S}^{d-1}} \int_0^\infty \mathcal{F}[g](r\theta) \{ \mathcal{F}[\mu](r\theta) - \mathcal{F}[\nu](r\theta) \} \mathcal{F}[\varphi](\lambda r) r^{d-1} dr d\sigma(\theta).$$

Since  $g$  is a real function,  $\mathcal{F}[g]$  is an even function, hence

$$\begin{aligned} & \int_{\mathbb{R}^d} g(x) d(\mu_\lambda - \nu_\lambda)(x) \\ &= \frac{1}{2} \int_{\mathbb{S}^{d-1}} \int_{\mathbb{R}} \mathcal{F}[g](r\theta) \{ \mathcal{F}[\mu](r\theta) - \mathcal{F}[\nu](r\theta) \} \mathcal{F}[\varphi](\lambda r) |r|^{d-1} dr d\sigma(\theta) \\ &= \frac{1}{2} \int_{\mathbb{S}^{d-1}} \int_{\mathbb{R}} \mathcal{F}[g](r\theta) \{ \mathcal{F}[\theta_\#^* \mu](r) - \mathcal{F}[\theta_\#^* \nu](r) \} \mathcal{F}[\varphi](\lambda r) |r|^{d-1} dr d\sigma(\theta) \end{aligned} \quad (\text{S22})$$

$$\begin{aligned} &= \frac{1}{2} \int_{\mathbb{S}^{d-1}} \int_{\mathbb{R}} \int_{-R}^R \mathcal{F}[g](r\theta) e^{-ir u} d(\theta_\#^* \mu - \theta_\#^* \nu)(u) \mathcal{F}[\varphi](\lambda r) |r|^{d-1} dr d\sigma(\theta) \\ &= \frac{1}{2} \int_{\mathbb{S}^{d-1}} \int_{\mathbb{R}} \int_{\mathbb{R}^d} \int_{-R}^R g(x) e^{-ir(u+\langle \theta, x \rangle)} \{ d(\theta_\#^* \mu - \theta_\#^* \nu)(u) \} \mathcal{F}[\varphi](\lambda r) |r|^{d-1} dx dr d\sigma(\theta), \end{aligned} \quad (\text{S23})$$

where (S22) follows from (S1), (S23) results from the definition of the Fourier transform and the fact that  $u \in [-R, R]$ , and in the last line, we used the definition of the Fourier transform and Fubini's theorem. By making the change of variables  $x \rightarrow x - u\theta$ , we obtain

$$\begin{aligned} & \int_{\mathbb{R}^d} g(x) d(\mu_\lambda - \nu_\lambda)(x) \\ &= \frac{1}{2} \int_{\mathbb{S}^{d-1}} \int_{\mathbb{R}} \int_{\mathbb{R}^d} \int_{-R}^R g(x - u\theta) e^{-ir\langle \theta, x \rangle} d(\theta_\#^* \mu - \theta_\#^* \nu)(u) \mathcal{F}[\varphi](\lambda r) |r|^{d-1} dx dr d\sigma(\theta). \end{aligned}$$

Since we assumed  $\text{supp}(\mu)$ ,  $\text{supp}(\nu)$  are included in  $B_d(\mathbf{0}, R)$ , then  $\text{supp}(\mu_\lambda)$ ,  $\text{supp}(\nu_\lambda)$  are in  $B_d(\mathbf{0}, R + \lambda)$ , and the domain of  $x \mapsto g(x - u\theta)$  must be contained in  $B_d(\mathbf{0}, 2R + \lambda)$ . By Fubini's theorem and the definition of  $\tilde{\mathcal{G}}$ , we have

$$\begin{aligned} & \left| \int_{\mathbb{R}^d} g(x) d(\mu_\lambda - \nu_\lambda)(x) \right| \\ & \leq \frac{1}{2} \int_{\mathbb{R}} \int_{B_d(\mathbf{0}, 2R + \lambda)} \int_{\mathbb{S}^{d-1}} \left| \int_{-R}^R g(x - u\theta) d(\theta_\#^* \mu - \theta_\#^* \nu)(u) e^{-ir\langle \theta, x \rangle} \mathcal{F}[\varphi](\lambda r) |r|^{d-1} d\sigma(\theta) dx dr \right| \\ & \leq \frac{1}{2} \int_{\mathbb{R}} \int_{B_d(\mathbf{0}, 2R + \lambda)} \int_{\mathbb{S}^{d-1}} \gamma_{\tilde{\mathcal{G}}}(\theta_\#^* \mu, \theta_\#^* \nu) \left| e^{-ir\langle \theta, x \rangle} \mathcal{F}[\varphi](\lambda r) |r|^{d-1} \right| d\sigma(\theta) dx dr \\ & \leq C(2R + \lambda)^d \int_{\mathbb{S}^{d-1}} \gamma_{\tilde{\mathcal{G}}}(\theta_\#^* \mu, \theta_\#^* \nu) d\sigma(\theta) \int_{\mathbb{R}} \lambda^{-d} \left| \mathcal{F}[\varphi](r) |r|^{d-1} \right| dr \end{aligned} \quad (\text{S24})$$

$$\leq C(2R + \lambda)^d \lambda^{-d} \left( \int_{\mathbb{S}^{d-1}} \gamma_{\tilde{\mathcal{G}}}^p(\theta_\#^* \mu, \theta_\#^* \nu) d\sigma(\theta) \right)^{1/p} \int_{\mathbb{R}} \left| \mathcal{F}[\varphi](r) |r|^{d-1} \right| dr \quad (\text{S25})$$

$$\leq C_1(2R + \lambda)^d \lambda^{-d} \mathbf{S} \gamma_{\tilde{\mathcal{G}}, p}(\mu, \nu), \quad (\text{S26})$$

where in (S24),  $C > 0$  and does not depend on  $\mu$  and  $\nu$ , (S25) results from applying Hölder's inequality on  $\mathbb{S}^{d-1}$  if  $p > 1$ , and in (S26),  $C_1 = C \int_{\mathbb{R}} \left| \mathcal{F}[\varphi](r) |r|^{d-1} \right| dr$ .

By using the definition of  $\gamma_{\tilde{\mathcal{G}}}$  and (S26), we obtain

$$\gamma_{\tilde{\mathcal{G}}}(\mu_\lambda, \nu_\lambda) = \sup_{g \in \tilde{\mathcal{G}}} \left| \int_{\mathbb{R}^d} g(x) d(\mu_\lambda - \nu_\lambda)(x) \right| \leq C_1(2R + \lambda)^d \lambda^{-d} \mathbf{S} \gamma_{\tilde{\mathcal{G}}, p}(\mu, \nu). \quad (\text{S27})$$

We now relate  $\gamma_{\tilde{\mathcal{G}}}(\mu_\lambda, \nu_\lambda)$  with  $\gamma_{\tilde{\mathcal{G}}}(\mu, \nu)$ . We start with the following estimate

$$\begin{aligned} & \int_{\mathbb{R}^d} g(x) d(\mu - \nu)(x) - \gamma_{\tilde{\mathcal{G}}}(\mu_\lambda, \nu_\lambda) \\ & \leq \int_{\mathbb{R}^d} g(x) d(\mu - \nu)(x) - \int_{\mathbb{R}^d} g(x) d(\mu_\lambda - \nu_\lambda)(x) \\ & \leq \int_{\mathbb{R}^d} |g(x) - (\varphi_\lambda * g)(x)| d\mu(x) + \int_{\mathbb{R}^d} |g(x) - (\varphi_\lambda * g)(x)| d\nu(x) \end{aligned} \quad (\text{S28})$$



Since we assumed any  $g \in \mathbf{G}$  is L-Lipschitz continuous, we can bound the integrand in (S28) as follows: for  $x \in \mathbb{R}^d$ ,

$$\begin{aligned} |g(x) - (\varphi_\lambda * g)(x)| &= \left| \lambda^{-d} \int_{\mathbb{R}^d} (g(x) - g(y)) \varphi((x-y)/\lambda) dy \right| \\ &\leq \lambda^{-d} \int_{\mathbb{R}^d} |g(x) - g(y)| \varphi((x-y)/\lambda) dy \\ &\leq L \lambda^{-d+1} \int_{\mathbb{R}^d} \|x-y\| \lambda^{-1} \varphi((x-y)/\lambda) dy \\ &\leq L \lambda^{-d+1} \int_{\mathbb{R}^d} \|u\| \lambda^{-1} \varphi(u/\lambda) du \leq L \lambda \int_{\mathbb{R}^d} \|z\| \varphi(z) dz . \end{aligned}$$

Hence, by denoting by  $M_1(\varphi)$  the moment of order 1 of  $\varphi$ , (S28) is bounded by

$$\int_{\mathbb{R}^d} g(x) d(\mu - \nu)(x) - \gamma_{\mathbf{G}}(\mu_\lambda, \nu_\lambda) \leq 2LM_1(\varphi)\lambda .$$

Taking the supremum of both sides over  $\mathbf{G}$  gives us

$$\gamma_{\mathbf{G}}(\mu, \nu) - \gamma_{\mathbf{G}}(\mu_\lambda, \nu_\lambda) \leq 2LM_1(\varphi)\lambda .$$

By combining the above inequality with (S27), we get

$$\begin{aligned} \gamma_{\mathbf{G}}(\mu, \nu) &\leq C_1(2R + \lambda)^d \lambda^{-d} \mathbf{S}\gamma_{\tilde{\mathbf{G}},p}(\mu, \nu) + 2LM_1(\varphi)\lambda \\ &\leq C_2 \lambda \left( (2R + \lambda)^d \lambda^{-(d+1)} \mathbf{S}\gamma_{\tilde{\mathbf{G}},p}(\mu, \nu) + 1 \right) , \end{aligned}$$

with  $C_2$  satisfying  $C_2 \geq C_1$  and  $C_2 \geq 2LM_1(\varphi)$ . Finally, by choosing  $\lambda = R^{d/(d+1)} \mathbf{S}\gamma_{\tilde{\mathbf{G}},p}(\mu, \nu)^{1/(d+1)}$  and using the hypothesis that  $\mathbf{S}\gamma_{\tilde{\mathbf{G}},p}$  is bounded, we obtain

$$\begin{aligned} \gamma_{\mathbf{G}}(\mu, \nu) &\leq C_2 R^{d/(d+1)} \mathbf{S}\gamma_{\tilde{\mathbf{G}},p}(\mu, \nu)^{1/(d+1)} \left( (2R + \lambda)^d R^{-d} + 1 \right) \\ &\leq C_p \mathbf{S}\gamma_{\tilde{\mathbf{G}},p}(\mu, \nu)^{1/(d+1)} , \end{aligned}$$

for some  $C_p > 0$ , as desired. This concludes the proof. □

As with Theorem 2, Theorem 3 assumes that the function classes  $\mathbf{G}$  and  $\tilde{\mathbf{G}}$  are linked to each other and sufficiently regular. The condition on  $\mathbf{G}$  is verified with  $\mathbf{W}_1$  (simply by definition) and MMD (provided that the reproducing kernel is Lipschitz-continuous, which holds on compact spaces for classical choices of kernels), but not with TV. On the other hand, the second condition requires  $\tilde{\mathbf{G}}$  to be large enough to contain *any* possible slice  $g(x - u\theta)$  for any  $g \in \mathbf{G}$ .

### S1.5 Proof of Corollary 1

*Proof of Corollary 1.* The desired result is obtained as a direct application of Theorems 2 and 3. □

### S1.6 Proof of Theorem 4

*Proof of Theorem 4.* Let  $p \in [1, \infty)$  and  $\mu, \nu$  in  $\mathcal{P}(\mathbb{R}^d)$  with respective empirical measures  $\hat{\mu}_n, \hat{\nu}_n$ . By using the definition of  $\mathbf{S}\Delta_p$ , the triangle inequality and the assumption on the sample complexity

of  $\Delta^p$ , we have

$$\begin{aligned}
\mathbb{E} |\mathbf{S}\Delta_p^p(\mu, \nu) - \mathbf{S}\Delta_p^p(\hat{\mu}_n, \hat{\nu}_n)| &= \mathbb{E} \left| \int_{\mathbb{S}^{d-1}} \{ \Delta^p(\theta_{\#}^* \mu, \theta_{\#}^* \nu) - \Delta^p(\theta_{\#}^* \hat{\mu}_n, \theta_{\#}^* \hat{\nu}_n) \} d\sigma(\theta) \right| \\
&\leq \mathbb{E} \left\{ \int_{\mathbb{S}^{d-1}} | \Delta^p(\theta_{\#}^* \mu, \theta_{\#}^* \nu) - \Delta^p(\theta_{\#}^* \hat{\mu}_n, \theta_{\#}^* \hat{\nu}_n) | d\sigma(\theta) \right\} \\
&\leq \int_{\mathbb{S}^{d-1}} \mathbb{E} | \Delta^p(\theta_{\#}^* \mu, \theta_{\#}^* \nu) - \Delta^p(\theta_{\#}^* \hat{\mu}_n, \theta_{\#}^* \hat{\nu}_n) | d\sigma(\theta) \\
&\leq \int_{\mathbb{S}^{d-1}} \beta(p, n) d\sigma(\theta) = \beta(p, n),
\end{aligned}$$

which completes the proof.  $\square$

### S1.7 Proof of Theorem 5

*Proof of Theorem 5.* Let  $p \in [1, \infty)$  and  $\mu \in \mathcal{P}(\mathbb{R}^d)$  with corresponding empirical measure  $\hat{\mu}_n$ . By using the definition of  $\mathbf{S}\Delta_p$ , the triangle inequality and the assumed convergence rate of empirical measures in  $\Delta^p$ , we obtain the convergence rate in  $\mathbf{S}\Delta_p$  as follows

$$\begin{aligned}
\mathbb{E} |\mathbf{S}\Delta_p^p(\hat{\mu}_n, \mu)| &= \mathbb{E} \left| \int_{\mathbb{S}^{d-1}} \Delta^p(\theta_{\#}^* \hat{\mu}_n, \theta_{\#}^* \mu) d\sigma(\theta) \right| \leq \mathbb{E} \left\{ \int_{\mathbb{S}^{d-1}} | \Delta^p(\theta_{\#}^* \hat{\mu}_n, \theta_{\#}^* \mu) | d\sigma(\theta) \right\} \\
&\leq \int_{\mathbb{S}^{d-1}} \mathbb{E} | \Delta^p(\theta_{\#}^* \hat{\mu}_n, \theta_{\#}^* \mu) | d\sigma(\theta) \leq \int_{\mathbb{S}^{d-1}} \alpha(p, n) d\sigma(\theta) = \alpha(p, n). \quad (\text{S29})
\end{aligned}$$

Additionally, if we assume that  $\Delta$  satisfies non-negativity, symmetry and the triangle inequality, then  $\mathbf{S}\Delta_p$  also verifies these three properties by Proposition 1, and we can derive its sample complexity: for any  $\mu, \nu$  in  $\mathcal{P}(\mathbb{R}^d)$  with respective empirical measures  $\hat{\mu}_n, \hat{\nu}_n$ , the triangle inequality give us

$$|\mathbf{S}\Delta_p(\mu, \nu) - \mathbf{S}\Delta_p(\hat{\mu}_n, \hat{\nu}_n)| \leq \mathbf{S}\Delta_p(\hat{\mu}_n, \mu) + \mathbf{S}\Delta_p(\hat{\nu}_n, \nu) \quad (\text{S30})$$

By taking the expectation of (S30) with respect to  $\hat{\mu}_n, \hat{\nu}_n$ , we obtain

$$\begin{aligned}
\mathbb{E} |\mathbf{S}\Delta_p(\mu, \nu) - \mathbf{S}\Delta_p(\hat{\mu}_n, \hat{\nu}_n)| &\leq \mathbb{E} |\mathbf{S}\Delta_p(\hat{\mu}_n, \mu)| + \mathbb{E} |\mathbf{S}\Delta_p(\hat{\nu}_n, \nu)| \\
&\leq \{ \mathbb{E} |\mathbf{S}\Delta_p^p(\hat{\mu}_n, \mu)| \}^{1/p} + \{ \mathbb{E} |\mathbf{S}\Delta_p^p(\hat{\nu}_n, \nu)| \}^{1/p} \quad (\text{S31}) \\
&\leq \alpha(p, n)^{1/p} + \alpha(p, n)^{1/p} = 2\alpha(p, n)^{1/p}, \quad (\text{S32})
\end{aligned}$$

where (S31) results from applying Hölder's inequality on  $\mathbb{S}^{d-1}$  if  $p > 1$ , and (S32) follows from the convergence rate result in (S29).  $\square$

### S1.8 Proof of Theorem 6

*Proof of Theorem 6.* Let  $p \in [1, \infty)$  and  $\mu, \nu \in \mathcal{P}(\mathbb{R}^d)$ . We recall that  $\widehat{\mathbf{S}\Delta}_{p,L}(\mu, \nu)$  denotes the approximation of  $\mathbf{S}\Delta_p(\mu, \nu)$  obtained with a Monte Carlo scheme that uniformly picks  $L$  projection directions on  $\mathbb{S}^{d-1}$  (cf. Equation (5) in the main document).

By using Hölder's inequality and the results on the moments of the Monte Carlo estimation error, we obtain

$$\begin{aligned}
\mathbb{E}_{\theta \sim \sigma} |\widehat{\mathbf{S}\Delta}_{p,L}^p(\mu, \nu) - \mathbf{S}\Delta_p^p(\mu, \nu)| &\leq \{ \mathbb{E}_{\theta \sim \sigma} |\widehat{\mathbf{S}\Delta}_{p,L}^p(\mu, \nu) - \mathbf{S}\Delta_p^p(\mu, \nu)|^2 \}^{1/2} \\
&\leq L^{-1/2} \left\{ \int_{\mathbb{S}^{d-1}} \{ \Delta^p(\theta_{\#}^* \mu, \theta_{\#}^* \nu) - \mathbf{S}\Delta_p^p(\mu, \nu) \}^2 d\sigma(\theta) \right\}^{1/2},
\end{aligned}$$

Since  $\mathbf{S}\Delta_p^p(\mu, \nu) = \int_{\mathbb{S}^{d-1}} \Delta^p(\theta_{\#}^* \mu, \theta_{\#}^* \nu) d\sigma(\theta)$  by definition, the quantity  $\int_{\mathbb{S}^{d-1}} \{ \Delta^p(\theta_{\#}^* \mu, \theta_{\#}^* \nu) - \mathbf{S}\Delta_p^p(\mu, \nu) \}^2 d\sigma(\theta)$  is the variance of  $\Delta^p(\theta_{\#}^* \mu, \theta_{\#}^* \nu)$  with respect to  $\theta \sim \sigma$ .  $\square$

### S1.9 The overall complexity

We now leverage Theorems 4 and 6 to derive the *overall complexity* of sliced divergences, *i.e.* the convergence rate of  $\widehat{\mathbf{S}\Delta}_p(\hat{\mu}_n, \hat{\nu}_n)$  to  $\mathbf{S}\Delta_p(\mu, \nu)$ . This result is useful as it helps understanding the behavior of sliced divergences in most practical applications, where  $\mathbf{S}\Delta_p(\mu, \nu)$  is approximated using finite sets of samples drawn from  $\mu$  and  $\nu$  along with Monte Carlo estimates.

**Corollary S4.** *Let  $p \in [1, \infty)$  and  $\mu, \nu \in \mathcal{P}(\mathbb{R}^d)$ . Denote by  $\hat{\mu}_n$  (respectively,  $\hat{\nu}_n$ ) the empirical distribution computed over a sequence of i.i.d. random variables  $X_{1:n} = \{X_k\}_{k=1}^n$  from  $\mu$  (resp.,  $Y_{1:n} = \{Y_k\}_{k=1}^n$  from  $\nu$ ). Assume  $\Delta^p$  admits the following sample complexity: for any  $\mu', \nu' \in \mathcal{P}(\mathbb{R}^d)$  and empirical instantiations  $\hat{\mu}'_n, \hat{\nu}'_n$ ,  $\mathbb{E}[|\Delta^p(\mu', \nu') - \Delta^p(\hat{\mu}'_n, \hat{\nu}'_n)|] \leq \beta(p, n)$ . Then,*

$$\begin{aligned} \mathbb{E}[|\widehat{\mathbf{S}\Delta}_{p,L}^p(\hat{\mu}_n, \hat{\nu}_n) - \mathbf{S}\Delta_p^p(\mu, \nu)|] &\leq \beta(p, n) \\ &+ L^{-1/2} \left[ \int_{\mathbb{S}^{d-1}} \mathbb{E} \left[ (\Delta^p(\theta_{\#}^* \hat{\mu}_n, \theta_{\#}^* \hat{\nu}_n) - \mathbf{S}\Delta_p^p(\hat{\mu}_n, \hat{\nu}_n))^2 \right] d\sigma(\theta) \right]^{1/2}, \end{aligned}$$

where  $\widehat{\mathbf{S}\Delta}_{p,L}^p(\hat{\mu}_n, \hat{\nu}_n)$  is defined by (5), and  $\mathbb{E}$  is the expectation with respect to (w.r.t.)  $X_{1:n}, Y_{1:n}$  and  $\{\theta_l\}_{l=1}^L$  i.i.d. from the uniform distribution on  $\mathbb{S}^{d-1}$ .

*Proof of Corollary S4.* Let  $p \in [1, \infty)$ ,  $\mu, \nu \in \mathcal{P}(\mathbb{R}^d)$  and the respective empirical distributions  $\hat{\mu}_n, \hat{\nu}_n$ . By the triangle inequality,

$$|\widehat{\mathbf{S}\Delta}_{p,L}^p(\hat{\mu}_n, \hat{\nu}_n) - \mathbf{S}\Delta_p^p(\mu, \nu)| \leq |\widehat{\mathbf{S}\Delta}_{p,L}^p(\hat{\mu}_n, \hat{\nu}_n) - \mathbf{S}\Delta_p^p(\hat{\mu}_n, \hat{\nu}_n)| + |\mathbf{S}\Delta_p^p(\hat{\mu}_n, \hat{\nu}_n) - \mathbf{S}\Delta_p^p(\mu, \nu)|.$$

Therefore, by linearity of expectation, we have

$$\begin{aligned} &\mathbb{E}[|\widehat{\mathbf{S}\Delta}_{p,L}^p(\hat{\mu}_n, \hat{\nu}_n) - \mathbf{S}\Delta_p^p(\mu, \nu)|] \\ &\leq \mathbb{E} \left[ \mathbb{E}[|\widehat{\mathbf{S}\Delta}_{p,L}^p(\hat{\mu}_n, \hat{\nu}_n) - \mathbf{S}\Delta_p^p(\hat{\mu}_n, \hat{\nu}_n)| \mid X_{1:n}, Y_{1:n}] \right] + \mathbb{E}[|\mathbf{S}\Delta_p^p(\hat{\mu}_n, \hat{\nu}_n) - \mathbf{S}\Delta_p^p(\mu, \nu)|]. \end{aligned} \quad (\text{S33})$$

We bound the left term in (S33). By Theorem 6, we have

$$\begin{aligned} &\mathbb{E}[|\widehat{\mathbf{S}\Delta}_{p,L}^p(\hat{\mu}_n, \hat{\nu}_n) - \mathbf{S}\Delta_p^p(\hat{\mu}_n, \hat{\nu}_n)| \mid X_{1:n}, Y_{1:n}] \\ &\leq L^{-1/2} \left\{ \int_{\mathbb{S}^{d-1}} \{ \Delta^p(\theta_{\#}^* \hat{\mu}_n, \theta_{\#}^* \hat{\nu}_n) - \mathbf{S}\Delta_p^p(\hat{\mu}_n, \hat{\nu}_n) \}^2 d\sigma(\theta) \right\}^{1/2}. \end{aligned}$$

By taking the expectation then using Jensen's inequality, we get

$$\begin{aligned} &\mathbb{E} \left[ \mathbb{E}[|\widehat{\mathbf{S}\Delta}_{p,L}^p(\hat{\mu}_n, \hat{\nu}_n) - \mathbf{S}\Delta_p^p(\hat{\mu}_n, \hat{\nu}_n)| \mid X_{1:n}, Y_{1:n}] \right] \\ &\leq L^{-1/2} \mathbb{E} \left[ \left\{ \int_{\mathbb{S}^{d-1}} \{ \Delta^p(\theta_{\#}^* \hat{\mu}_n, \theta_{\#}^* \hat{\nu}_n) - \mathbf{S}\Delta_p^p(\hat{\mu}_n, \hat{\nu}_n) \}^2 d\sigma(\theta) \right\}^{1/2} \right] \\ &\leq L^{-1/2} \mathbb{E}^{1/2} \left[ \int_{\mathbb{S}^{d-1}} \{ \Delta^p(\theta_{\#}^* \hat{\mu}_n, \theta_{\#}^* \hat{\nu}_n) - \mathbf{S}\Delta_p^p(\hat{\mu}_n, \hat{\nu}_n) \}^2 d\sigma(\theta) \right]. \end{aligned} \quad (\text{S34})$$

Next, we bound the right term in (S33): by the sample complexity assumption for  $\Delta^p$  and Theorem 4, we have

$$\mathbb{E}[|\mathbf{S}\Delta_p^p(\hat{\mu}_n, \hat{\nu}_n) - \mathbf{S}\Delta_p^p(\mu, \nu)|] \leq \beta(p, n). \quad (\text{S35})$$

Combining (S34) and (S35) in (S33) completes the proof.  $\square$

**Remark 1.** *Note that by Fubini's theorem,  $\int_{\mathbb{S}^{d-1}} \mathbb{E}[(\Delta^p(\theta_{\#}^* \hat{\mu}_n, \theta_{\#}^* \hat{\nu}_n) - \mathbf{S}\Delta_p^p(\hat{\mu}_n, \hat{\nu}_n))^2] d\sigma(\theta)$  (which appears in Corollary S4) is equal to  $\mathbb{E}[\text{Var}\{\Delta^p(\theta_{\#}^* \hat{\mu}_n, \theta_{\#}^* \hat{\nu}_n) \mid X_{1:n}, Y_{1:n}\}]$ , where  $\text{Var}$  is the variance w.r.t.  $X_{1:n}, Y_{1:n}$  and  $\theta$  (which is distributed according to the uniform distribution on  $\mathbb{S}^{d-1}$  and independent of  $X_{1:n}, Y_{1:n}$ ).*

## S2 Postponed proofs for Section 4

### S2.1 Applications of Theorem 1

As discussed in Section 4, we can use the general result in Theorem 1 to establish novel topological properties for specific sliced probability divergences, for example the Sliced-Cramér distance (whose definition is recalled in Definition S2) and the broader class of Sliced-IPMs. We present our results and proofs for these examples below.

**Definition S1** (Cramér distance [8]). *Let  $p \in [1, \infty)$  and  $\mu, \nu \in \mathcal{P}(\mathbb{R})$ . Denote by  $F_\mu, F_\nu$  the cumulative distribution functions of  $\mu, \nu$  respectively. The Cramér distance of order  $p$  between  $\mu$  and  $\nu$  is defined by*

$$\mathbf{C}_p^p(\mu, \nu) = \int_{\mathbb{R}} |F_\mu(t) - F_\nu(t)|^p dt .$$

**Definition S2** (Sliced-Cramér distance [9]). *Let  $p \in [1, \infty)$  and  $\mu, \nu \in \mathcal{P}(\mathbb{R}^d)$ . The Sliced-Cramér distance of order  $p$  between  $\mu$  and  $\nu$  is defined by*

$$\mathbf{SC}_p^p(\mu, \nu) = \int_{\mathbb{S}^{d-1}} \mathbf{C}_p^p(\theta_\#^* \mu, \theta_\#^* \nu) d\sigma(\theta) .$$

**Corollary S5.** *Let  $p \in [1, \infty)$ . For any sequence  $(\mu_k)_{k \in \mathbb{N}}$  in  $\mathcal{P}(\mathbb{R}^d)$  and  $\mu \in \mathcal{P}(\mathbb{R}^d)$ ,  $\lim_{k \rightarrow \infty} \mathbf{SC}_p^p(\mu_k, \mu) = 0$  implies  $(\mu_k)_{k \in \mathbb{N}}$  converges weakly to  $\mu$ . Besides, if  $(\mu_k)_{k \in \mathbb{N}}$  and  $\mu$  are supported on a compact space  $\mathbf{K} \subset \mathbb{R}^d$ , then the converse implication holds, meaning that the convergence under  $\mathbf{SC}_p^p$  is equivalent to the weak convergence in  $\mathcal{P}(\mathbf{K})$ .*

*Proof.* Let  $p \in [1, \infty)$ . By Hölder's inequality, for any  $\mu', \nu' \in \mathcal{P}(\mathbb{R})$ , we have

$$\mathbf{C}_1(\mu', \nu') \leq \mathbf{C}_p(\mu', \nu') . \quad (\text{S36})$$

Consider a sequence  $(\mu'_k)_{k \in \mathbb{N}}$  in  $\mathcal{P}(\mathbb{R})$  and  $\mu' \in \mathcal{P}(\mathbb{R})$  such that  $\lim_{k \rightarrow \infty} \mathbf{C}_p(\mu'_k, \mu') = 0$ . By (S36), this implies  $\lim_{k \rightarrow \infty} \mathbf{C}_1(\mu'_k, \mu') = 0$ . Since the Cramér distance of order 1 is equivalent to the Wasserstein distance of order 1, then by [10, Theorem 6.8], the convergence of  $(\mu'_k)_{k \in \mathbb{N}}$  to  $\mu'$  under  $\mathbf{C}_p$  implies  $(\mu'_k)_{k \in \mathbb{N}}$  converges weakly to  $\mu'$  in  $\mathcal{P}(\mathbb{R})$ . By Theorem 1, we conclude that the convergence under  $\mathbf{SC}_p^p$  implies the weak convergence in  $\mathcal{P}(\mathbb{R}^d)$ .

We now show the second part of the statement. This result partly follows from slight modifications of the techniques we used in the proof of Theorem 1. Consider a compact space  $\mathbf{K}' \subset \mathbb{R}$  and a sequence  $(\mu'_k)_{k \in \mathbb{N}}$  in  $\mathcal{P}(\mathbf{K}')$ . Suppose that  $(\mu'_k)_{k \in \mathbb{N}}$  converges weakly to  $\mu' \in \mathcal{P}(\mathbf{K}')$ . Since  $F_{\mu'}$  is non-decreasing, it is almost everywhere continuous w.r.t. to the Lebesgue convergence, and using the Portmanteau theorem, we get that for Leb-almost every  $t \in \mathbb{R}$ ,  $\lim_{k \rightarrow \infty} F_{\mu'_k}(t) = F_{\mu'}(t)$ . Besides, for any  $k \in \mathbb{N}$  and  $t \in \mathbf{K}'$ ,  $|F_{\mu'_k}(t)| \leq 1$ , and since  $\mathbf{K}'$  is compact,  $(\int_{\mathbf{K}'} 1^p dt)^{1/p} < \infty$ . By the dominated convergence theorem in  $L^p$ -spaces, we conclude that

$$\lim_{k \rightarrow \infty} \left\{ \int_{\mathbf{K}'} |F_{\mu'_k}(t) - F_{\mu'}(t)|^p dt \right\}^{1/p} = 0 , \quad (\text{S37})$$

in other words, the weak convergence of measures in  $\mathcal{P}(\mathbf{K}')$ , where  $\mathbf{K}'$  is a compact subspace of  $\mathbb{R}$ , implies the convergence under  $\mathbf{C}_p$ .

Now, consider a compact space  $\mathbf{K} \subset \mathbb{R}^d$  and a sequence  $(\mu_k)_{k \in \mathbb{N}}$  in  $\mathcal{P}(\mathbf{K})$  which converges weakly to  $\mu \in \mathcal{P}(\mathbf{K})$ . For any  $\theta \in \mathbb{S}^{d-1}$ , define  $\mathbf{K}_\theta = \{(\theta, x) : x \in \mathbf{K}\}$ , which is a compact subset of  $\mathbb{R}$  (since it is the image of  $\mathbf{K}$  by a continuous function) with  $\text{diam}(\mathbf{K}_\theta) \leq \text{diam}(\mathbf{K})$  (by the Cauchy-Schwarz inequality). The sequence of pushforward measures  $(\theta_\#^* \mu_k)_{k \in \mathbb{N}}$  is in  $\mathcal{P}(\mathbf{K}_\theta)$  and, by the continuous mapping theorem, converges weakly to  $\theta_\#^* \mu \in \mathcal{P}(\mathbf{K}_\theta)$ . Therefore, by (S37), for any  $\theta \in \mathbb{S}^{d-1}$ ,

$$\lim_{k \rightarrow \infty} \mathbf{C}_p(\theta_\#^* \mu_k, \theta_\#^* \mu) = 0 . \quad (\text{S38})$$

Besides, for any  $\mu, \nu \in \mathcal{P}(\mathbb{R}^d)$  with support in  $\mathbf{K}$ , and  $\theta \in \mathbb{S}^{d-1}$ ,

$$\begin{aligned} \mathbf{C}_p(\theta_\#^* \nu, \theta_\#^* \mu) &= \int_{\mathbb{R}} |F_\nu(t) - F_\mu(t)|^p dt = \int_{\mathbf{K}_\theta} |F_\nu(t) - F_\mu(t)|^p dt \\ &\leq 2^p \text{diam}(\mathbf{K}_\theta) \leq 2^p \text{diam}(\mathbf{K}) . \end{aligned}$$

By (S38) and the dominated convergence theorem, we finally obtain  $\lim_{k \rightarrow \infty} \mathbf{SC}_p(\mu_k, \mu) = 0$ .  $\square$

**Corollary S6.** *Let  $p \in [1, \infty)$  and  $\tilde{\mathbb{F}} \subset \mathbb{M}_b(\mathbb{R})$ . Suppose that the space spanned by  $\tilde{\mathbb{F}}$  is dense in the space of continuous functions for  $\|\cdot\|_\infty$ . Then, the convergence under the Sliced Integral Probability Metric of order  $p$  associated with  $\tilde{\mathbb{F}}$ ,  $\mathbf{S}\gamma_{\tilde{\mathbb{F}}, p}$ , implies the weak convergence in  $\mathcal{P}(\mathbb{R}^d)$ . Besides, if  $\gamma_{\tilde{\mathbb{F}}}$  is bounded, the converge implication holds, i.e. the weak convergence in  $\mathcal{P}(\mathbb{R}^d)$  implies the convergence under  $\mathbf{S}\gamma_{\tilde{\mathbb{F}}, p}$ .*

*Proof.* By construction of  $\tilde{\mathbb{F}}$  and [11, Section 5.1],  $\gamma_{\tilde{\mathbb{F}}}$  metrizes the weak convergence in  $\mathcal{P}(\mathbb{R})$ , i.e. the weak convergence in  $\mathcal{P}(\mathbb{R})$  is equivalent to the convergence of measures under  $\gamma_{\tilde{\mathbb{F}}}$ . The properties of  $\mathbf{S}\gamma_{\tilde{\mathbb{F}}, p}$ ,  $p \in [1, \infty)$  result from the application of Theorem 1.  $\square$

**Remark 2.** *The boundedness assumption for  $\gamma_{\tilde{\mathbb{F}}}$  is achieved if we additionally suppose that  $\tilde{\mathbb{F}}$  is a uniformly bounded family of functions in  $\mathbb{M}(\mathbb{R})$ , which is a mild assumption.*

## S2.2 Proof of Corollary 2

**Lemma S2.** *Let  $p \in [1, \infty)$  and  $\mu' \in \mathcal{P}(\mathbb{R})$  with empirical distribution  $\hat{\mu}'_n$ . Suppose there exists  $q > p$  such that the moment of order  $q$  of  $\mu'$ , defined as  $M_q(\mu') = \int_{\mathbb{R}} |t|^q d\mu'(t)$ , is bounded above by  $K < \infty$ . Then, there exists a constant  $C_{p,q}$  depending on  $p, q$  such that*

$$\mathbb{E} [\mathbf{W}_p^p(\hat{\mu}'_n, \mu')] \leq C_{p,q} K \begin{cases} n^{-1/2} & \text{if } q > 2p, \\ n^{-1/2} \log(n) & \text{if } q = 2p, \\ n^{-(q-p)/q} & \text{if } q \in (p, 2p). \end{cases}$$

*Proof.* This immediately results from [12, Theorem 1].  $\square$

*Proof of Corollary 2.* We first recall that, for any  $\xi \in \mathcal{P}(\mathbb{R}^s)$  ( $s \geq 1$ ) and  $\theta \in \mathbb{S}^{d-1}$ , the moment of order  $k > 0$  of  $\theta_\#^* \xi$  is lower than the one associated with  $\xi$ . Indeed, by using the property of pushforward measures, the Cauchy-Schwarz inequality, and  $\|\theta\| \leq 1$ , we have

$$M_k(\theta_\#^* \xi) = \int_{\mathbb{R}^d} |t|^k d\theta_\#^* \xi(t) = \int_{\mathbb{R}^d} |\langle \theta, x \rangle|^k d\xi(x) \leq \int_{\mathbb{R}^d} \|x\|^k d\xi(x) = M_k(\xi). \quad (\text{S39})$$

Now, let  $p \in [1, \infty)$  and  $\mu \in \mathcal{P}_q(\mathbb{R}^d)$  ( $q > p$ ) with empirical distribution  $\hat{\mu}_n$ . Then, by (S39), for any  $\theta \in \mathbb{S}^{d-1}$ ,  $M_q(\theta_\#^* \mu) \leq M_q(\mu) < \infty$ , and we can apply Lemma S2 and Theorem 5 to derive the convergence rate under  $\mathbf{SW}_p$ : there exists a constant  $C_{p,q}$  such that,

$$\mathbb{E} [\mathbf{SW}_p^p(\hat{\mu}_n, \mu)] \leq C_{p,q} M_q^{p/q}(\mu) \begin{cases} n^{-1/2} & \text{if } q > 2p, \\ n^{-1/2} \log(n) & \text{if } q = 2p, \\ n^{-(q-p)/q} & \text{if } q \in (p, 2p). \end{cases} \quad (\text{S40})$$

Besides, since  $\mathbf{W}_p$  is a metric, we can apply Theorem 5 to derive the sample complexity of  $\mathbf{SW}_p$ . Consider  $\mu, \nu \in \mathcal{P}_q(\mathbb{R}^d)$  with  $q > p$ , with respective empirical measures  $\hat{\mu}_n, \hat{\nu}_n$ . Then, starting from (S31) and using the convergence rate derived in (S40), we obtain the desired result as follows

$$\begin{aligned} & \mathbb{E} |\mathbf{SW}_p(\mu, \nu) - \mathbf{SW}_p(\hat{\mu}_n, \hat{\nu}_n)| \\ & \leq \left\{ \mathbb{E} |\mathbf{SW}_p^p(\hat{\mu}_n, \mu)| \right\}^{1/p} + \left\{ \mathbb{E} |\mathbf{SW}_p^p(\hat{\nu}_n, \nu)| \right\}^{1/p} \\ & \leq C_{p,q}^{1/p} (M_q^{1/q}(\mu) + M_q^{1/q}(\nu)) \begin{cases} n^{-1/(2p)} & \text{if } q > 2p, \\ n^{-1/(2p)} \log(n)^{1/p} & \text{if } q = 2p, \\ n^{-(q-p)/(pq)} & \text{if } q \in (p, 2p). \end{cases} \end{aligned}$$

$\square$

### S2.3 Proof of Theorem 7

*Proof of Theorem 7.* Let  $p \in [1, \infty)$  and  $\varepsilon \geq 0$ . We use the reformulation of  $\mathbf{W}_{p,\varepsilon}$  as the maximum of an expectation, as given in [13, Proposition 2.1],

$$\begin{aligned} \mathbf{SW}_{p,\varepsilon}^p(\mu, \nu) &= \int_{\mathbb{S}^{d-1}} \mathbf{W}_{p,\varepsilon}^p(\theta_{\sharp}^* \mu, \theta_{\sharp}^* \nu) d\sigma(\theta) \\ &= \int_{\mathbb{S}^{d-1}} \left\{ \max_{\tilde{u}, \tilde{v} \in C(\mathbb{R})} \mathbb{E}_{\theta_{\sharp}^* \mu \otimes \theta_{\sharp}^* \nu} \left[ \phi_{\varepsilon}(\tilde{u}(\tilde{X}), \tilde{v}(\tilde{Y}), \tilde{X}, \tilde{Y}) \right] \right\}^p d\sigma(\theta), \end{aligned} \quad (\text{S41})$$

where  $C(\mathbb{R})$  denotes the set of continuous real functions, and  $\phi_{\varepsilon}(t, s, x, y) = t + s - \varepsilon e^{(t+s-\|x-y\|^p)/\varepsilon}$ .

Consider for any  $\theta \in \mathbb{S}^{d-1}$ ,  $\tilde{u}_{\theta}^*$ ,  $\tilde{v}_{\theta}^*$  as the functions attaining the maximum in (S41), which exist by [14, Theorem 4 in the supplementary document]. We obtain

$$\begin{aligned} \mathbf{SW}_{p,\varepsilon}^p(\mu, \nu) &= \int_{\mathbb{S}^{d-1}} \left\{ \mathbb{E}_{\theta_{\sharp}^* \mu \otimes \theta_{\sharp}^* \nu} \left[ \phi_{\varepsilon}(\tilde{u}_{\theta}^*(\tilde{X}), \tilde{v}_{\theta}^*(\tilde{Y}), \tilde{X}, \tilde{Y}) \right] \right\}^p d\sigma(\theta) \\ &= \int_{\mathbb{S}^{d-1}} \left\{ \mathbb{E}_{\mu \otimes \nu} \left[ \phi_{\varepsilon}(\tilde{u}_{\theta}^* \circ \theta^*(X), \tilde{v}_{\theta}^* \circ \theta^*(Y), X, Y) \right] \right\}^p d\sigma(\theta). \end{aligned} \quad (\text{S42})$$

Since for all  $\tilde{w} \in C(\mathbb{R})$  and  $\theta \in \mathbb{S}^{d-1}$ ,  $\tilde{w} \circ \theta^* \in C(\mathbb{R}^d)$ , we can bound (S42) as follows

$$\mathbf{SW}_{p,\varepsilon}^p(\mu, \nu) \leq \int_{\mathbb{S}^{d-1}} \left\{ \max_{u, v \in C(\mathbb{R}^d)} \mathbb{E}_{\mu \otimes \nu} \left[ \phi_{\varepsilon}(u(X), v(Y), X, Y) \right] \right\}^p d\sigma(\theta) = \mathbf{W}_{p,\varepsilon}^p(\mu, \nu). \quad (\text{S43})$$

By Proposition 1, since  $\mathbf{W}_{p,\varepsilon}$  is non-negative, so is  $\mathbf{SW}_{p,\varepsilon}$ , and we can apply  $t \mapsto t^{1/p}$  on both sides of (S43) to obtain the final result.  $\square$

### S2.4 Proof of Theorem 8

**Proposition S1.** *Let  $\tilde{X}$  be a compact subset of  $\mathbb{R}$ , and  $\mu', \nu' \in \mathcal{P}(\tilde{X})$  with respective empirical instantiations  $\hat{\mu}'_n, \hat{\nu}'_n$ . Let  $p \in [1, \infty)$  and  $\varepsilon \geq 0$ . Then,*

$$|\mathbf{W}_{p,\varepsilon}(\hat{\mu}'_n, \hat{\nu}'_n) - \mathbf{W}_{p,\varepsilon}(\mu', \nu')| \leq 2 \text{diam}(\tilde{X}) \{ \mathbf{W}_1(\mu', \hat{\mu}'_n) + \mathbf{W}_1(\nu', \hat{\nu}'_n) \}. \quad (\text{S44})$$

*Proof.* Let  $p \in [1, \infty)$ ,  $\varepsilon \geq 0$  and  $\tilde{X} \subset \mathbb{R}$  compact. Consider  $\mu', \nu' \in \mathcal{P}(\tilde{X})$  with respective empirical distributions  $\hat{\mu}'_n, \hat{\nu}'_n$ . We first express the regularized OT cost as the maximum of an expectation [13, Proposition 2.1]

$$\mathbf{W}_{p,\varepsilon}(\mu', \nu') = \max_{\tilde{u}, \tilde{v} \in C(\mathbb{R})} \mathbb{E}_{\mu' \otimes \nu'} \left[ \phi_{\varepsilon}(\tilde{u}(\tilde{X}), \tilde{v}(\tilde{Y}), \tilde{X}, \tilde{Y}) \right] \quad (\text{S45})$$

$$\mathbf{W}_{p,\varepsilon}(\hat{\mu}'_n, \hat{\nu}'_n) = \max_{\tilde{u}, \tilde{v} \in C(\mathbb{R})} \mathbb{E}_{\hat{\mu}'_n \otimes \hat{\nu}'_n} \left[ \phi_{\varepsilon}(\tilde{u}(\tilde{X}), \tilde{v}(\tilde{Y}), \tilde{X}, \tilde{Y}) \right], \quad (\text{S46})$$

where  $\phi_{\varepsilon}(t, s, x, y) = t + s - \varepsilon e^{(t+s-\|x-y\|^2/2)/\varepsilon}$ . By [14, Proposition 1], the Sinkhorn potentials  $(\tilde{u}, \tilde{v})$  are Lipschitz continuous with Lipschitz constant  $\text{diam}(\tilde{X}) < \infty$ . Therefore, by denoting by  $\text{Lip}_{\text{diam}(\tilde{X})}(\mathbb{R})$  the space of  $\text{diam}(\tilde{X})$ -Lipschitz continuous functions defined on  $\mathbb{R}$ , (S45) and (S46) can be rewritten with the maximization over  $\text{Lip}_{\text{diam}(\tilde{X})}(\mathbb{R})$ .

We can now use [15, Proposition 2] to bound the absolute difference of  $\mathbf{W}_{p,\varepsilon}(\mu', \nu')$  and  $\mathbf{W}_{p,\varepsilon}(\hat{\mu}'_n, \hat{\nu}'_n)$ . We provide the detailed proof below for completeness. By [15, Proposition 6, Appendix A], there exist smooth potentials  $(\tilde{u}^*, \tilde{v}^*)$  attaining the maximum in (S45) such that, for all

$\tilde{x}, \tilde{y} \in \mathbb{R}$ ,

$$\int_{\mathbb{R}} \phi_{\varepsilon}(\tilde{u}^*(\tilde{x}), \tilde{v}^*(\tilde{y}), \tilde{x}, \tilde{y}) d\nu'(\tilde{y}) = 1 \quad \mu' \text{-almost surely,} \quad (\text{S47})$$

$$\int_{\mathbb{R}} \phi_{\varepsilon}(\tilde{u}^*(\tilde{x}), \tilde{v}^*(\tilde{y}), \tilde{x}, \tilde{y}) d\mu'(\tilde{x}) = 1 \quad \nu' \text{-almost surely.} \quad (\text{S48})$$

Analogously, there exist smooth optimal potentials  $(\tilde{u}_n^*, \tilde{v}_n^*)$  for (S46) satisfying (S47) and (S48) where  $\tilde{u}^*$ ,  $\tilde{v}^*$  and  $\mu'$  are replaced by  $\tilde{u}_n^*$ ,  $\tilde{v}_n^*$  and  $\hat{\mu}'_n$  respectively.

The optimality of these potentials give us

$$\begin{aligned} & \mathbb{E}_{\mu' \otimes \nu'} [\phi_{\varepsilon}(\tilde{u}_n^*(\tilde{X}), \tilde{v}_n^*(\tilde{Y}), \tilde{X}, \tilde{Y})] - \mathbb{E}_{\hat{\mu}'_n \otimes \nu'} [\phi_{\varepsilon}(\tilde{u}_n^*(\tilde{X}), \tilde{v}_n^*(\tilde{Y}), \tilde{X}, \tilde{Y})] \\ & \leq \mathbb{E}_{\mu' \otimes \nu'} [\phi_{\varepsilon}(\tilde{u}^*(\tilde{X}), \tilde{v}^*(\tilde{Y}), \tilde{X}, \tilde{Y})] - \mathbb{E}_{\hat{\mu}'_n \otimes \nu'} [\phi_{\varepsilon}(\tilde{u}_n^*(\tilde{X}), \tilde{v}_n^*(\tilde{Y}), \tilde{X}, \tilde{Y})] \\ & \leq \mathbb{E}_{\mu' \otimes \nu'} [\phi_{\varepsilon}(\tilde{u}^*(\tilde{X}), \tilde{v}^*(\tilde{Y}), \tilde{X}, \tilde{Y})] - \mathbb{E}_{\hat{\mu}'_n \otimes \nu'} [\phi_{\varepsilon}(\tilde{u}^*(\tilde{X}), \tilde{v}^*(\tilde{Y}), \tilde{X}, \tilde{Y})]. \end{aligned}$$

Therefore,

$$\begin{aligned} & |\mathbf{W}_{p,\varepsilon}(\mu', \nu') - \mathbf{W}_{p,\varepsilon}(\hat{\mu}'_n, \nu')| \\ & = \left| \mathbb{E}_{\mu' \otimes \nu'} [\phi_{\varepsilon}(\tilde{u}^*(\tilde{X}), \tilde{v}^*(\tilde{Y}), \tilde{X}, \tilde{Y})] - \mathbb{E}_{\hat{\mu}'_n \otimes \nu'} [\phi_{\varepsilon}(\tilde{u}_n^*(\tilde{X}), \tilde{v}_n^*(\tilde{Y}), \tilde{X}, \tilde{Y})] \right| \\ & \leq \left| \mathbb{E}_{\mu' \otimes \nu'} [\phi_{\varepsilon}(\tilde{u}^*(\tilde{X}), \tilde{v}^*(\tilde{Y}), \tilde{X}, \tilde{Y})] - \mathbb{E}_{\hat{\mu}'_n \otimes \nu'} [\phi_{\varepsilon}(\tilde{u}^*(\tilde{X}), \tilde{v}^*(\tilde{Y}), \tilde{X}, \tilde{Y})] \right| \\ & \quad + \left| \mathbb{E}_{\mu' \otimes \nu'} [\phi_{\varepsilon}(\tilde{u}_n^*(\tilde{X}), \tilde{v}_n^*(\tilde{Y}), \tilde{X}, \tilde{Y})] - \mathbb{E}_{\hat{\mu}'_n \otimes \nu'} [\phi_{\varepsilon}(\tilde{u}_n^*(\tilde{X}), \tilde{v}_n^*(\tilde{Y}), \tilde{X}, \tilde{Y})] \right|. \quad (\text{S49}) \end{aligned}$$

We bound each term of the sum in (S49) as follows

$$\begin{aligned} & \left| \mathbb{E}_{\mu' \otimes \nu'} [\phi_{\varepsilon}(\tilde{u}^*(\tilde{X}), \tilde{v}^*(\tilde{Y}), \tilde{X}, \tilde{Y})] - \mathbb{E}_{\hat{\mu}'_n \otimes \nu'} [\phi_{\varepsilon}(\tilde{u}^*(\tilde{X}), \tilde{v}^*(\tilde{Y}), \tilde{X}, \tilde{Y})] \right| \\ & = \left| \int_{\mathbb{R}} \tilde{u}^*(\tilde{x}) d(\mu' - \hat{\mu}'_n)(\tilde{x}) - \varepsilon \int_{\mathbb{R}} \int_{\mathbb{R}} e^{(\tilde{u}^*(\tilde{x}) + \tilde{v}^*(\tilde{y}) - |\tilde{x} - \tilde{y}|^2/2)/\varepsilon} d\nu'(\tilde{y}) d(\mu' - \hat{\mu}'_n)(\tilde{x}) \right| \\ & = \left| \int_{\mathbb{R}} \tilde{u}^*(\tilde{x}) d(\mu' - \hat{\mu}'_n)(\tilde{x}) \right| \leq \sup_{\tilde{u} \in \text{Lip}_{\text{diam}(\tilde{X})}(\mathbb{R})} \left| \int_{\mathbb{R}} \tilde{u}(\tilde{x}) d(\mu' - \hat{\mu}'_n)(\tilde{x}) \right|, \quad (\text{S50}) \end{aligned}$$

where (S50) results from (S47). Since for any  $f \in \text{Lip}_L(\mathbb{R})$  with  $L > 0$ ,  $f/L \in \text{Lip}_1(\mathbb{R})$ , (S50) can be bounded as follows

$$\begin{aligned} & \left| \mathbb{E}_{\mu' \otimes \nu'} [\phi_{\varepsilon}(\tilde{u}^*(\tilde{X}), \tilde{v}^*(\tilde{Y}), \tilde{X}, \tilde{Y})] - \mathbb{E}_{\hat{\mu}'_n \otimes \nu'} [\phi_{\varepsilon}(\tilde{u}^*(\tilde{X}), \tilde{v}^*(\tilde{Y}), \tilde{X}, \tilde{Y})] \right| \\ & \leq \text{diam}(\tilde{X}) \sup_{\tilde{u} \in \text{Lip}_1(\mathbb{R})} \left| \int_{\mathbb{R}} \tilde{u}(\tilde{x}) d(\theta_{\sharp}^* \mu - \theta_{\sharp}^* \hat{\mu}'_n)(\tilde{x}) \right| = \text{diam}(\tilde{X}) \mathbf{W}_1(\mu', \hat{\mu}'_n), \quad (\text{S51}) \end{aligned}$$

where (S51) follows from the dual formulation of the Wasserstein distance of order 1 [10, Theorem 5.10].

We show with an analogous proof that

$$\left| \mathbb{E}_{\mu' \otimes \nu'} [\phi_{\varepsilon}(\tilde{u}_n^*(\tilde{X}), \tilde{v}_n^*(\tilde{Y}), \tilde{X}, \tilde{Y})] - \mathbb{E}_{\hat{\mu}'_n \otimes \nu'} [\phi_{\varepsilon}(\tilde{u}_n^*(\tilde{X}), \tilde{v}_n^*(\tilde{Y}), \tilde{X}, \tilde{Y})] \right| \leq \text{diam}(\tilde{X}) \mathbf{W}_1(\mu', \hat{\mu}'_n),$$

which leads to the conclusion that

$$|\mathbf{W}_{p,\varepsilon}(\mu', \nu') - \mathbf{W}_{p,\varepsilon}(\hat{\mu}'_n, \nu')| \leq 2 \text{diam}(\tilde{X}) \mathbf{W}_1(\mu', \hat{\mu}'_n). \quad (\text{S52})$$

By using the triangle inequality and (S52), we obtain the final result

$$\begin{aligned} |\mathbf{W}_{p,\varepsilon}(\hat{\mu}'_n, \hat{\nu}'_n) - \mathbf{W}_{p,\varepsilon}(\mu', \nu')| & \leq |\mathbf{W}_{p,\varepsilon}(\mu', \nu') - \mathbf{W}_{p,\varepsilon}(\hat{\mu}'_n, \nu')| + |\mathbf{W}_{p,\varepsilon}(\hat{\mu}'_n, \nu') - \mathbf{W}_{p,\varepsilon}(\hat{\mu}'_n, \hat{\nu}'_n)| \\ & \leq 2 \text{diam}(\tilde{X}) \{ \mathbf{W}_1(\mu', \hat{\mu}'_n) + \mathbf{W}_1(\nu', \hat{\nu}'_n) \}. \end{aligned}$$

□

**Corollary S7.** Let  $\tilde{X}$  be a compact subset of  $\mathbb{R}$ , and  $\mu', \nu' \in \mathcal{P}(\tilde{X})$ . Denote by  $\hat{\mu}'_n, \hat{\nu}'_n$  their respective empirical instantiations. Let  $p \in [1, \infty)$  and  $\varepsilon \geq 0$ . Then,

$$\mathbb{E} |\mathbf{W}_{p,\varepsilon}(\hat{\mu}'_n, \hat{\nu}'_n) - \mathbf{W}_{p,\varepsilon}(\mu', \nu')| \leq 2 \text{diam}(\tilde{X}) C_q [M_q^{1/q}(\mu') + M_q^{1/q}(\nu')] n^{-1/2},$$

where  $q > 2$ ,  $C_q < \infty$  is a constant that depends on  $q$ , and  $M_q(\mu'), M_q(\nu')$  are the moments of order  $q$  of  $\mu', \nu'$  respectively.

*Proof.* We apply Proposition S1 and take the expectation of (S44) with respect to  $\tilde{X}_{1:n} \sim \hat{\mu}'_n$  and  $\tilde{Y}_{1:n} \sim \hat{\nu}'_n$

$$\mathbb{E} |\mathbf{W}_{p,\varepsilon}(\hat{\mu}'_n, \hat{\nu}'_n) - \mathbf{W}_{p,\varepsilon}(\mu', \nu')| \leq 2 \text{diam}(\tilde{X}) \mathbb{E} \{ \mathbf{W}_1(\mu', \hat{\mu}'_n) + \mathbf{W}_1(\nu', \hat{\nu}'_n) \}. \quad (\text{S53})$$

Since  $\mu'$  and  $\nu'$  are both supported on a compact space, they have infinitely many finite moments. We can then bound (S53) using the convergence rate of empirical measures in  $\mathbf{W}_1$ , recalled in Lemma S2. This concludes the proof.  $\square$

*Proof of Theorem 8.* Let  $p \in [1, \infty)$  and  $\varepsilon \geq 0$ . Consider  $\mu, \nu \in \mathcal{P}(X)$  with  $X \subset \mathbb{R}^d$  compact, and denote by  $\hat{\mu}_n, \hat{\nu}_n$  their respective empirical distributions.

Let  $\theta \in \mathbb{S}^{d-1}$  and define  $X_\theta = \{ \langle \theta, x \rangle : x \in X \}$ .  $X_\theta$  is compact (since  $X$  is compact and  $\theta^*$  is continuous) and verifies  $\text{diam}(X_\theta) \leq \text{diam}(X)$  (by the Cauchy-Schwarz inequality). Besides, by (S39), for any  $k > 0$ ,  $M_k(\theta_\#^* \mu) \leq M_k(\mu)$  and  $M_k(\theta_\#^* \nu) \leq M_k(\nu)$ . By Corollary S7, there exists  $C_q < \infty$  which depends on  $q > 2$  such that,

$$\mathbb{E} |\mathbf{W}_{p,\varepsilon}(\theta_\#^* \hat{\mu}_n, \theta_\#^* \hat{\nu}_n) - \mathbf{W}_{p,\varepsilon}(\theta_\#^* \mu, \theta_\#^* \nu)| \leq 2 \text{diam}(X) C_q [M_q^{1/q}(\mu) + M_q^{1/q}(\nu)] n^{-1/2}.$$

The sample complexity of  $\mathbf{SW}_{p,\varepsilon}$  is finally obtained by applying Theorem 4.  $\square$

## S2.5 Proof of Proposition 2

Sinkhorn's algorithm refers to an iterative procedure which operates on empirical distributions as follows: consider a cost matrix  $C$  between two sets of  $n$  samples, and define the matrix  $K$  with  $K_{i,j} = \exp(-C_{i,j}/\varepsilon)$  for  $1 \leq i, j \leq n$ , and initialize  $b^{(0)} = 1 \in \mathbb{R}^n$ ; then, compute for  $\ell > 1$ ,  $a^{(\ell)} = 1./n(Kb^{(\ell-1)})$ ,  $b^{(\ell)} = 1./n(Ka^{(\ell)})$ , where  $./$  stands for the entry-wise division. This defines a sequence  $\gamma_{i,j}^{(\ell)} = a_i^{(\ell)} K_{i,j} b_j^{(\ell)}$ , which converges to a solution of (3) at a linear rate. The convergence rate of Sinkhorn's algorithm is recalled in Theorem S1. For an extended discussion on this result, we refer to [16, Section 4.2].

**Theorem S1** ([17]). *The iterates  $a^{(\ell)}$  and  $b^{(\ell)}$  of Sinkhorn's algorithm converge linearly for the Hilbert metric at a rate  $1 - \tanh(\tau(K)/4)$ , with  $\tau(K) = \log \max_{i,j,i',j'} \frac{K_{ij}K_{i'j'}}{K_{ij'}K_{i'j}}$ . In particular, for the squared-norm cost, i.e.  $K_{ij} = \exp(-\|x_i - x_j\|^2/\varepsilon)$ , it holds*

$$\tau(K) \leq 2 \max_{i,j} \|x_i - x_j\|^2/\varepsilon.$$

*Proof of Proposition 2.* For  $i, j \in \{1, \dots, n\}$ , the function  $f_{i,j} : \theta \in \mathbb{S}^{d-1} \mapsto \frac{1}{R} \langle \theta, x_i - x_j \rangle$  is 1-Lipschitz and has median 0 for  $\theta$  uniformly distributed on the unit sphere. Thus, by concentration of measure on the sphere [18, Example 3.12], it holds for  $\varepsilon > 0$ ,

$$\mathbb{P} (|f_{i,j}(\theta)| \geq \varepsilon) \leq \sqrt{2\pi} \exp(-d\varepsilon^2/2).$$

Taking a union bound over the  $n(n-1)$  pairs of indices and setting  $\tau = (R\varepsilon)^2$ , it follows

$$\mathbb{P} \left( \max_{i,j} |\langle \theta, x_i - x_j \rangle|^2 \geq \tau \right) \leq \sqrt{2\pi} n^2 \exp(-d\tau/2R^2).$$

Hence, for any  $\delta > 0$ , it holds with probability  $1 - \delta$  that  $\max_{i,j} |\langle \theta, x_i - x_j \rangle|^2 \leq \frac{2R^2}{d} \log(\sqrt{2\pi} n^2/\delta)$ . This argument was suggested to us by an anonymous reviewer.  $\square$



### S3 Additional experimental results

All of our experimental findings presented in this paper and its supplementary document can be reproduced with the code that we provided here: [https://github.com/kimiandj/sliced\\_div](https://github.com/kimiandj/sliced_div).

In this section, we provide additional results obtained for the synthetical experiments illustrating the sample complexity of Sliced-Wasserstein and Sliced-Sinkhorn divergences: we produce figures analogously to Figures 2(b), 3(a) and 3(b), with different hyperparameter values.

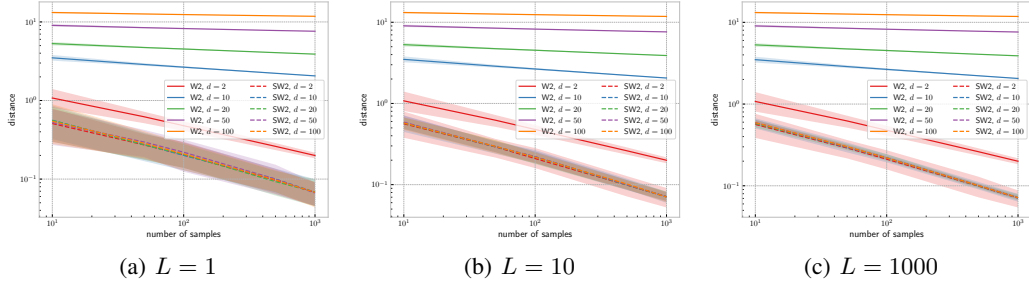

Figure S1: Illustration of Corollary 2: Wasserstein and Sliced-Wasserstein distances of order 2 between two sets of  $n$  samples generated from  $\mathcal{N}(\mathbf{0}, \mathbf{I}_d)$  vs.  $n$ , for different  $d$ , on log-log scale.  $\text{SW}_2$  is approximated with  $L$  random projections,  $L \in \{1, 10, 1000\}$ . Results are averaged over 100 runs, and the shaded areas correspond to the 10th-90th percentiles. Figure 2(b) shows the results for  $L = 100$ .

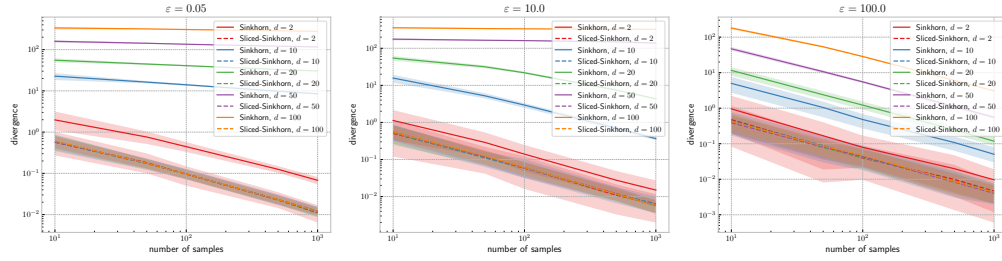

(a) Influence of the data dimension for  $\varepsilon \in \{0.05, 10, 100\}$

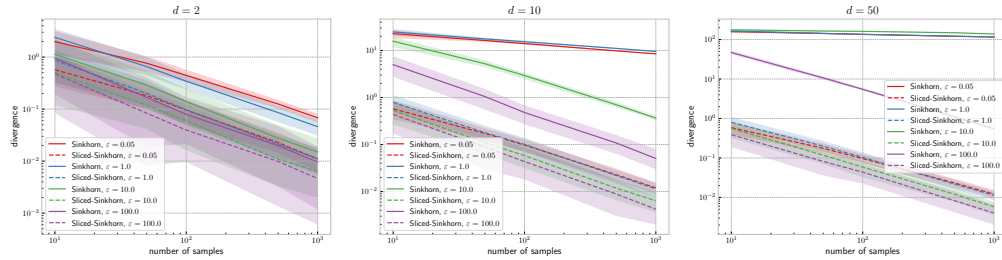

(b) Influence of the regularization coefficient for  $d \in \{2, 10, 50\}$

Figure S2: Illustration of Theorem 8: Sinkhorn and Sliced-Sinkhorn divergences between two sets of  $n$  samples generated from  $\mathcal{N}(\mathbf{0}, \mathbf{I}_d)$  for different values of  $n$ , dimension  $d$ , and regularization coefficient  $\varepsilon$ . Sliced-Sinkhorn is approximated with 10 random projections. Results are averaged over 100 runs, and the shaded areas correspond to the 10th-90th percentiles. All plots have a log-log scale. Figure 3(a) shows the influence of the dimension for  $\varepsilon = 1$ , and Figure 3(b) shows the influence of the regularization for  $d = 100$ .

## References

- [1] Nicolas Bonnotte. *Unidimensional and Evolution Methods for Optimal Transportation*. PhD thesis, Paris 11, 2013.
- [2] Kimia Nadjahi, Alain Durmus, Umut Şimşekli, and Roland Badeau. Asymptotic Guarantees for Learning Generative Models with the Sliced-Wasserstein Distance. In *Advances in Neural Information Processing Systems*, 2019.
- [3] V.I. Bogachev. *Measure Theory*. Number vol. 1 in Measure Theory. Springer Berlin Heidelberg, 2007.
- [4] O. Kallenberg. *Foundations of modern probability*. Probability and its Applications (New York). Springer-Verlag, New York, 1997.
- [5] Patrick Billingsley. *Convergence of probability measures*. Wiley Series in Probability and Statistics: Probability and Statistics. John Wiley & Sons Inc., New York, second edition, 1999. A Wiley-Interscience Publication.
- [6] G. B. Folland. *Real analysis*. Pure and Applied Mathematics (New York). John Wiley & Sons, Inc., New York, second edition, 1999. Modern techniques and their applications, A Wiley-Interscience Publication.
- [7] Suvrit Sra. Directional statistics in machine learning: a brief review, 2016.
- [8] Harald Cramér. On the composition of elementary errors. *Scandinavian Actuarial Journal*, 1928(1):141–180, 1928.
- [9] Soheil Kolouri, Nicholas A. Ketz, Andrea Soltoggio, and Praveen K. Pilly. Sliced Cramer synaptic consolidation for preserving deeply learned representations. In *International Conference on Learning Representations*, 2020.
- [10] Cédric Villani. *Optimal transport: old and new*, volume 338. Springer Science & Business Media, 2008.
- [11] L. Ambrosio, N. Gigli, and G. Savare. *Gradient Flows: In Metric Spaces and in the Space of Probability Measures*. Lectures in Mathematics. ETH Zürich. Birkhäuser Basel, 2008.
- [12] Nicolas Fournier and Arnaud Guillin. On the rate of convergence in Wasserstein distance of the empirical measure. *Probability Theory and Related Fields*, 162(3-4):707, August 2015.
- [13] Aude Genevay, Marco Cuturi, Gabriel Peyré, and Francis Bach. Stochastic optimization for large-scale optimal transport. In D. D. Lee, M. Sugiyama, U. V. Luxburg, I. Guyon, and R. Garnett, editors, *Advances in Neural Information Processing Systems 29*, pages 3440–3448. Curran Associates, Inc., 2016.
- [14] Aude Genevay, Lénaïc Chizat, Francis Bach, Marco Cuturi, and Gabriel Peyré. Sample complexity of Sinkhorn divergences. In *Proceedings of Machine Learning Research*, pages 1574–1583, 2019.
- [15] Gonzalo Mena and Jonathan Niles-Weed. Statistical bounds for entropic optimal transport: sample complexity and the central limit theorem. In H. Wallach, H. Larochelle, A. Beygelzimer, F. d’Alché Buc, E. Fox, and R. Garnett, editors, *Advances in Neural Information Processing Systems 32*, pages 4543–4553. Curran Associates, Inc., 2019.
- [16] Gabriel Peyré, Marco Cuturi, et al. Computational optimal transport. *Foundations and Trends® in Machine Learning*, 11(5-6):355–607, 2019.
- [17] Joel Franklin and Jens Lorenz. On the scaling of multidimensional matrices. *Linear Algebra and its applications*, 114:717–735, 1989.
- [18] Martin J Wainwright. *High-dimensional statistics: A non-asymptotic viewpoint*, volume 48. Cambridge University Press, 2019.
